# Supplementary material for: Discovery of new tetrazines for bioorthogonal reactions with strained alkenes via computational chemistry
Source: Royal Society of Chemistry journal article supplement (doi:10.1039/d3ra08712c), 2024-01-01
Supplement: d3ra08712c1.pdf [file d3ra08712c1.pdf]

### Classification of EWG-/EDG- characteristics of substituents according to Hammett constants:

Electronic characterization of the substituents used in this study is provided in the following table (Hammett constants -  $\sigma_p$ ):

| Entry    | $\sigma_p$  | R <sup>1</sup>          | R <sup>2</sup> = Ph |                |                            | R <sup>2</sup> = Me |                |                            |
|----------|-------------|-------------------------|---------------------|----------------|----------------------------|---------------------|----------------|----------------------------|
|          |             |                         | E(LUMO) [eV]        | E(LUMO+1) [eV] | $\Delta G^\ddagger$ kJ/mol | E(LUMO) [eV]        | E(LUMO+1) [eV] | $\Delta G^\ddagger$ kJ/mol |
| 1        | 0.54        | CF <sub>3</sub>         | -0.0891             | -0.0726        | 54.1                       | -0.0918             | -0.0540        | 57.4                       |
| 2        | 0.1         | SeMe                    | -0.0701             | -0.0481        | 75.5                       | -0.0697             | -0.0230        | 79.2                       |
| 3        | 0.19        | NCO                     | -0.0814             | -0.0613        | 65.9                       | -0.0823             | -0.0418        | 69.8                       |
| <b>4</b> | <b>0.72</b> | <b>SO<sub>2</sub>Me</b> | <b>-0.0917</b>      | <b>-0.0755</b> | <b>41.5</b>                | <b>-0.0945</b>      | <b>-0.0561</b> | <b>42.8</b>                |
| <b>5</b> | <b>0.49</b> | <b>SOMe</b>             | <b>-0.0843</b>      | <b>-0.0651</b> | <b>47.2</b>                | <b>-0.0861</b>      | <b>-0.0454</b> | <b>52.6</b>                |
| 6        | 0.08        | N <sub>3</sub>          | -0.0790             | -0.0585        | 70.3                       | -0.0792             | -0.0407        | 73.6                       |
| 7        | 0.15        | SMe                     | -0.0699             | -0.0472        | 75.2                       | -0.0693             | -0.0217        | 79.0                       |
| 8        | 0.52        | SCN                     | -0.0922             | -0.0683        | 56.6                       | -0.0943             | -0.0487        | 60.2                       |
| 9        | -0.66       | NH <sub>2</sub>         | -0.0633             | -0.0308        | 87.0                       | -0.0611             | 0.0008         | 90.7                       |
| 10       | 0.23        | Br                      | -0.0834             | -0.0613        | 64.1                       | -0.0850             | -0.0393        | 67.4                       |
| 11       | 0.49        | NC                      | -0.0913             | -0.0796        | 53.0                       | -0.0940             | -0.0662        | 58.9                       |
| 12       | 0.23        | Cl                      | -0.0838             | -0.0606        | 62.9                       | -0.0852             | -0.0382        | 66.6                       |
| 13       | 0.66        | CN                      | -0.0940             | -0.0882        | 52.4                       | -0.0979             | -0.0763        | 54.7                       |
| 14       | 0.06        | F                       | -0.0873             | -0.0546        | 60.9                       | -0.0883             | -0.0279        | 65.0                       |

Hammett constants were obtained from previously published data.<sup>1</sup>

Literature:

1 – C. R. Hansch, A. Leo and R. W. Taft, *Chem. Rev.*, 1991, **91**, 165-1195.

### Coordinates of optimised structures:

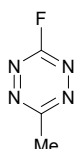

|   |             |             |             |
|---|-------------|-------------|-------------|
| C | 1.29837900  | 0.00000600  | -0.00251400 |
| C | -1.22441700 | 0.00003500  | 0.00900600  |
| N | -0.59677100 | 1.18524600  | 0.01191400  |
| N | -0.59678200 | -1.18521600 | 0.01191200  |
| N | 0.71461900  | 1.18759200  | 0.00550800  |
| N | 0.71457700  | -1.18759300 | 0.00550900  |
| F | 2.61118000  | -0.00002800 | -0.01350800 |

|   |             |             |             |
|---|-------------|-------------|-------------|
| C | -2.71967400 | -0.00000600 | -0.01229400 |
| H | -3.07649600 | -0.00161300 | -1.04701900 |
| H | -3.09968800 | -0.89522000 | 0.48108800  |
| H | -3.09966400 | 0.89667500  | 0.47841600  |

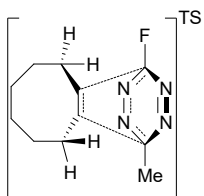

|   |             |             |             |
|---|-------------|-------------|-------------|
| C | -1.81540800 | -1.20009600 | 0.33939000  |
| C | -1.85858000 | 1.15815300  | -0.37736400 |
| N | -2.11291400 | 0.22290500  | -1.33684800 |
| N | -2.17089100 | 0.91230600  | 0.92549800  |
| N | -2.10484900 | -1.01149600 | -0.96309100 |
| C | 0.37142000  | -0.66154100 | 0.29146000  |
| C | 0.96173100  | -1.79803500 | -0.49027500 |
| C | 2.36244600  | 1.27522600  | 1.13916800  |
| C | 2.49874300  | -1.67838500 | -0.32665800 |
| C | 3.38777400  | 0.81010900  | 0.08836200  |
| C | 3.09098400  | -0.36318200 | -0.88089800 |
| H | 0.69740800  | -1.71023300 | -1.55104100 |
| H | 2.75655200  | -1.79359000 | 0.73465600  |
| H | 2.20727500  | 0.46912800  | 1.86570700  |
| H | 4.29489200  | 0.55024900  | 0.64874100  |
| H | 0.61408200  | -2.77085700 | -0.13195500 |
| H | 2.81756100  | 2.10198400  | 1.69818100  |
| H | 2.95944300  | -2.52641200 | -0.84505700 |
| H | 3.66380700  | 1.67207100  | -0.53358400 |
| H | 4.05325100  | -0.59882400 | -1.34983100 |
| H | 2.45676000  | -0.01489100 | -1.70383400 |
| C | 0.40770400  | 0.60801400  | -0.21433300 |
| C | 0.97510000  | 1.72337900  | 0.62817600  |
| H | 1.05834200  | 2.64545900  | 0.04295800  |
| H | 0.33045900  | 1.93431100  | 1.49140600  |
| H | 0.44109200  | -0.76708300 | 1.37638200  |
| H | 0.48726900  | 0.71209300  | -1.29578800 |
| N | -2.16330100 | -0.32317900 | 1.30010300  |
| F | -1.68739300 | -2.45838800 | 0.72673900  |
| C | -1.78919900 | 2.58922500  | -0.81314200 |
| H | -2.79186900 | 2.94954700  | -1.06183800 |
| H | -1.39003900 | 3.20622700  | -0.00668000 |
| H | -1.16236000 | 2.68536200  | -1.70203600 |

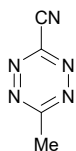

|   |             |             |             |
|---|-------------|-------------|-------------|
| C | 0.98409500  | -0.00001800 | 0.00126100  |
| C | -1.55553600 | 0.00008900  | 0.00871500  |
| N | -0.92901200 | 1.18823700  | 0.01329200  |
| N | -0.92905200 | -1.18815500 | 0.01329400  |
| N | 0.37917500  | 1.19232600  | 0.00866100  |
| N | 0.37906500  | -1.19235800 | 0.00866000  |
| C | 2.42994300  | -0.00006300 | -0.00793000 |
| N | 3.58446200  | -0.00000200 | -0.01432300 |
| C | -3.04797800 | 0.00000200  | -0.01728400 |
| H | -3.39516400 | -0.00358200 | -1.05582700 |
| H | -3.43022700 | -0.89594000 | 0.47302300  |
| H | -3.43021400 | 0.89911300  | 0.46713900  |

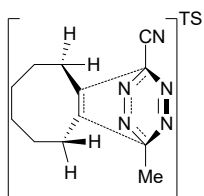

|   |             |             |             |
|---|-------------|-------------|-------------|
| C | 1.99940700  | 0.76013800  | 0.17103900  |
| C | 1.53315600  | -1.62501200 | -0.33955100 |
| N | 1.93584000  | -0.84338500 | -1.38492000 |
| N | 1.94945800  | -1.34444100 | 0.92919000  |
| N | 2.17442200  | 0.39391400  | -1.12820900 |
| C | -0.35012700 | 0.62687300  | 0.19892200  |
| C | -0.78456200 | 1.74712200  | -0.69652300 |
| C | -2.57352600 | -0.88348100 | 1.28276700  |
| C | -2.31959400 | 1.87377200  | -0.50089300 |
| C | -3.55363700 | -0.38966000 | 0.20284800  |
| C | -3.11795700 | 0.61226400  | -0.89706800 |
| H | -0.56764200 | 1.50640000  | -1.74431000 |
| H | -2.52588600 | 2.14283500  | 0.54343700  |
| H | -2.27714400 | -0.03491600 | 1.91047600  |
| H | -4.39363300 | 0.06347500  | 0.74430200  |
| H | -0.29812600 | 2.69577800  | -0.45161000 |
| H | -3.12564400 | -1.56616800 | 1.94002200  |
| H | -2.66099200 | 2.72074400  | -1.10552600 |
| H | -3.97356400 | -1.26382000 | -0.31225200 |
| H | -4.04891700 | 0.94002700  | -1.37349900 |
| H | -2.57083000 | 0.08515400  | -1.68674600 |
| C | -0.58146000 | -0.67066600 | -0.16752800 |
| C | -1.28688600 | -1.58959000 | 0.80201100  |
| H | -1.52983600 | -2.54217400 | 0.31940400  |
| H | -0.65475800 | -1.80907900 | 1.67215100  |

|   |             |             |             |
|---|-------------|-------------|-------------|
| H | -0.35058500 | 0.85444800  | 1.26727800  |
| H | -0.72530000 | -0.86533200 | -1.22957800 |
| N | 2.18552500  | -0.10860400 | 1.20058700  |
| C | 2.12519400  | 2.16663700  | 0.47744600  |
| N | 2.17049300  | 3.29532600  | 0.72047300  |
| C | 1.16515600  | -3.04212700 | -0.64627500 |
| H | 2.07043900  | -3.60179500 | -0.90120400 |
| H | 0.70418100  | -3.50793700 | 0.22560800  |
| H | 0.48710400  | -3.08491900 | -1.50097900 |

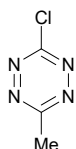

|    |             |             |             |
|----|-------------|-------------|-------------|
| C  | 0.88693700  | 0.00008000  | 0.00218400  |
| C  | -1.65038600 | 0.00012400  | 0.00851600  |
| N  | -1.02288200 | 1.18498600  | 0.01376800  |
| N  | -1.02283300 | -1.18488100 | 0.01375900  |
| N  | 0.28798300  | 1.18860800  | 0.01003400  |
| N  | 0.28787800  | -1.18856100 | 0.01004600  |
| Cl | 2.60517400  | -0.00006500 | -0.01054400 |
| C  | -3.14479800 | -0.00007200 | -0.01787100 |
| H  | -3.49613300 | -0.00510600 | -1.05465900 |
| H  | -3.52667200 | -0.89427400 | 0.47600400  |
| H  | -3.52668700 | 0.89862600  | 0.46769300  |

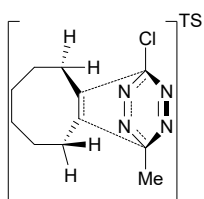

|   |             |             |             |
|---|-------------|-------------|-------------|
| C | 1.95599600  | -0.58391000 | -0.15331100 |
| C | 1.30411700  | 1.75121400  | 0.37314200  |
| N | 1.75849700  | 0.99198200  | 1.41332000  |
| N | 1.74814100  | 1.51295300  | -0.89443600 |
| N | 2.10288300  | -0.21939200 | 1.14403300  |
| C | -0.36310600 | -0.60763600 | -0.17609400 |
| C | -0.73823400 | -1.73646200 | 0.73584600  |
| C | -2.68395600 | 0.71866000  | -1.31425300 |
| C | -2.25502500 | -1.98179000 | 0.51880000  |
| C | -3.64334400 | 0.17146700  | -0.24155600 |
| C | -3.15438700 | -0.77929300 | 0.88117600  |
| H | -0.55782900 | -1.45816500 | 1.78134000  |
| H | -2.42323500 | -2.28117200 | -0.52430700 |
| H | -2.31567500 | -0.11597500 | -1.92227900 |
| H | -4.43948800 | -0.34989100 | -0.78808400 |

|    |             |             |             |
|----|-------------|-------------|-------------|
| H  | -0.17896100 | -2.65168600 | 0.52401500  |
| H  | -3.27401300 | 1.34817900  | -1.99151700 |
| H  | -2.54348700 | -2.84265100 | 1.13180600  |
| H  | -4.13385700 | 1.02065300  | 0.25265900  |
| H  | -4.06702800 | -1.17030000 | 1.34544900  |
| H  | -2.66384800 | -0.20168900 | 1.67262100  |
| C  | -0.70499000 | 0.67301200  | 0.16665500  |
| C  | -1.46070900 | 1.52421100  | -0.82581300 |
| H  | -1.78038900 | 2.46345700  | -0.36181600 |
| H  | -0.83220800 | 1.77667400  | -1.68943100 |
| H  | -0.33648400 | -0.85387900 | -1.23972100 |
| H  | -0.89041800 | 0.86641900  | 1.22231800  |
| N  | 2.08895200  | 0.30141300  | -1.17014600 |
| Cl | 2.33176600  | -2.22923600 | -0.53639400 |
| C  | 0.85250100  | 3.14330400  | 0.69145600  |
| H  | 1.71866300  | 3.75329100  | 0.96495900  |
| H  | 0.37511900  | 3.59101100  | -0.18122000 |
| H  | 0.16062300  | 3.13736900  | 1.53622100  |

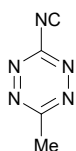

|   |             |             |             |
|---|-------------|-------------|-------------|
| C | 1.01340100  | 0.00002500  | 0.00173600  |
| C | -1.52385100 | 0.00006300  | 0.00831600  |
| N | -0.89582400 | 1.18608500  | 0.01295100  |
| N | -0.89582700 | -1.18601600 | 0.01295300  |
| N | 0.41229600  | 1.19188100  | 0.00897300  |
| N | 0.41224100  | -1.19185900 | 0.00897200  |
| N | 2.38720400  | -0.00002000 | -0.00767400 |
| C | 3.56531600  | -0.00006500 | -0.01648800 |
| C | -3.01730600 | -0.00002900 | -0.01728000 |
| H | -3.39900600 | 0.89849900  | 0.46870500  |
| H | -3.36792200 | -0.00373400 | -1.05446100 |
| H | -3.39906200 | -0.89522500 | 0.47482600  |

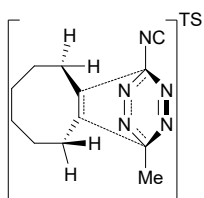

|   |             |             |             |
|---|-------------|-------------|-------------|
| C | 1.96995900  | 0.80603100  | 0.18915300  |
| C | 1.55080300  | -1.57916700 | -0.34637200 |
| N | 1.94469500  | -0.77885600 | -1.38056700 |
| N | 1.95316700  | -1.30154800 | 0.92722100  |
| N | 2.16599900  | 0.45873400  | -1.11014900 |
| C | -0.34909600 | 0.62281400  | 0.20302000  |

|   |             |             |             |
|---|-------------|-------------|-------------|
| C | -0.79874200 | 1.74701100  | -0.67915400 |
| C | -2.55916700 | -0.92324300 | 1.26902400  |
| C | -2.33434000 | 1.85731400  | -0.48093700 |
| C | -3.54487300 | -0.42684800 | 0.19545100  |
| C | -3.11972100 | 0.59252100  | -0.89235200 |
| H | -0.58069800 | 1.52082200  | -1.72993400 |
| H | -2.54268400 | 2.11089800  | 0.56690900  |
| H | -2.27144700 | -0.07900400 | 1.90648900  |
| H | -4.38939700 | 0.01107500  | 0.74242600  |
| H | -0.32090400 | 2.69758900  | -0.42433500 |
| H | -3.10401000 | -1.61924600 | 1.91838100  |
| H | -2.68522400 | 2.70810800  | -1.07480100 |
| H | -3.95584900 | -1.29906300 | -0.33007100 |
| H | -4.05394700 | 0.91592600  | -1.36541000 |
| H | -2.56655600 | 0.08043400  | -1.68767600 |
| C | -0.56869500 | -0.67298900 | -0.17780200 |
| C | -1.26530000 | -1.61025000 | 0.78023900  |
| H | -1.49761600 | -2.56008700 | 0.28702300  |
| H | -0.63096700 | -1.83238500 | 1.64807100  |
| H | -0.35507800 | 0.83910300  | 1.27369000  |
| H | -0.70937700 | -0.85795200 | -1.24199700 |
| N | 2.17191700  | -0.06529100 | 1.21076400  |
| N | 2.08215100  | 2.14610500  | 0.49358600  |
| C | 2.12535800  | 3.29565500  | 0.74062300  |
| C | 1.22321500  | -3.00340400 | -0.67005300 |
| H | 0.54891600  | -3.05512500 | -1.52730600 |
| H | 2.14281100  | -3.53785600 | -0.92719900 |
| H | 0.77012600  | -3.48991800 | 0.19470900  |

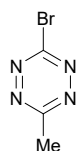

|    |             |             |             |
|----|-------------|-------------|-------------|
| C  | 0.26563400  | 0.00016300  | 0.00614800  |
| C  | -2.27242300 | 0.00018100  | 0.00815500  |
| N  | -1.64543100 | 1.18521800  | 0.01508000  |
| N  | -1.64531100 | -1.18504600 | 0.01506700  |
| N  | -0.33400900 | 1.18834600  | 0.01351500  |
| N  | -0.33412300 | -1.18822100 | 0.01353700  |
| Br | 2.13622400  | -0.00005500 | -0.00644400 |
| C  | -3.76672700 | -0.00014900 | -0.02223200 |
| H  | -4.11500900 | -0.00841700 | -1.06005400 |
| H  | -4.14981000 | -0.89299700 | 0.47321700  |
| H  | -4.14980300 | 0.90007900  | 0.45956900  |

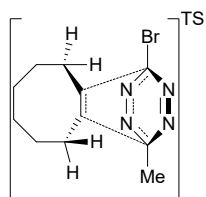

|    |             |             |             |
|----|-------------|-------------|-------------|
| C  | 1.65693300  | 0.31076900  | -0.01063400 |
| C  | 0.22891400  | 2.30581000  | 0.34779800  |
| N  | 0.86504700  | 1.80214900  | 1.44611400  |
| N  | 0.78784100  | 2.17125700  | -0.88922800 |
| N  | 1.61259700  | 0.76837900  | 1.26415500  |
| C  | -0.50751100 | -0.51170900 | -0.08688800 |
| C  | -0.53120300 | -1.63961900 | 0.89977900  |
| C  | -3.06422200 | -0.13312400 | -1.40844100 |
| C  | -1.85724500 | -2.40481700 | 0.64933400  |
| C  | -3.84444300 | -0.91170000 | -0.33338600 |
| C  | -3.13269700 | -1.56426200 | 0.87938400  |
| H  | -0.52131000 | -1.24857500 | 1.92458000  |
| H  | -1.84871200 | -2.81078800 | -0.37104900 |
| H  | -2.39627400 | -0.82475200 | -1.93500900 |
| H  | -4.37810500 | -1.70838600 | -0.86713700 |
| H  | 0.32063000  | -2.31428900 | 0.78227800  |
| H  | -3.79014300 | 0.21249200  | -2.15459800 |
| H  | -1.87311800 | -3.27073700 | 1.32019600  |
| H  | -4.62608500 | -0.25589600 | 0.07273200  |
| H  | -3.88544200 | -2.21504200 | 1.33901700  |
| H  | -2.91809600 | -0.80486200 | 1.63960700  |
| C  | -1.28292800 | 0.59284600  | 0.14322400  |
| C  | -2.22143600 | 1.07214800  | -0.93829100 |
| H  | -2.86987100 | 1.86928900  | -0.55900800 |
| H  | -1.66568100 | 1.47463500  | -1.79481100 |
| H  | -0.33637000 | -0.80267200 | -1.12547800 |
| H  | -1.58550500 | 0.77442900  | 1.17356700  |
| N  | 1.53006700  | 1.13477100  | -1.07847700 |
| Br | 2.65676100  | -1.25814300 | -0.30682700 |
| C  | -0.68766100 | 3.47033800  | 0.56392900  |
| H  | -0.09820200 | 4.35449600  | 0.82461300  |
| H  | -1.24519400 | 3.68249400  | -0.34935300 |
| H  | -1.37702500 | 3.26719700  | 1.38602200  |

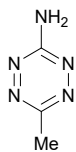

|   |             |             |             |
|---|-------------|-------------|-------------|
| C | 1.30148200  | 0.00004100  | -0.00678100 |
| C | -1.25565200 | 0.00005400  | 0.00760700  |
| N | -0.62505300 | 1.18230500  | 0.03157600  |
| N | -0.62502700 | -1.18225900 | 0.03156700  |

|   |             |             |             |
|---|-------------|-------------|-------------|
| N | 0.68078300  | 1.19365300  | 0.02758500  |
| N | 0.68074800  | -1.19361600 | 0.02764400  |
| N | 2.65431500  | -0.00004000 | -0.09259700 |
| H | 3.12925400  | 0.86653000  | 0.11143500  |
| H | 3.12898900  | -0.86687100 | 0.11096500  |
| C | -2.75204400 | -0.00003900 | -0.03859500 |
| H | -3.14029500 | 0.89594200  | 0.44788200  |
| H | -3.10060300 | -0.00264300 | -1.07635100 |
| H | -3.14042400 | -0.89359900 | 0.45224600  |

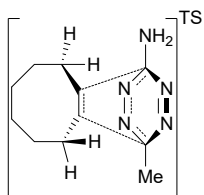

|   |             |             |             |
|---|-------------|-------------|-------------|
| C | 1.89524600  | 1.15492900  | 0.31216300  |
| C | 1.68606400  | -1.24192600 | -0.37444800 |
| N | 2.02451500  | -0.34553900 | -1.35810600 |
| N | 2.07433500  | -1.00548300 | 0.91900100  |
| N | 2.13017200  | 0.88230600  | -1.01402200 |
| C | -0.29686700 | 0.68116000  | 0.29192500  |
| C | -0.89361900 | 1.80954100  | -0.49646100 |
| C | -2.38597100 | -1.15998600 | 1.16760900  |
| C | -2.43194600 | 1.74192300  | -0.33059500 |
| C | -3.40032500 | -0.70164300 | 0.10561000  |
| C | -3.06929600 | 0.44682200  | -0.87935300 |
| H | -0.63547100 | 1.70870900  | -1.55815100 |
| H | -2.68381700 | 1.86775500  | 0.73109400  |
| H | -2.20489300 | -0.33480100 | 1.86669600  |
| H | -4.30496900 | -0.41145400 | 0.65522700  |
| H | -0.53435400 | 2.78605100  | -0.15142900 |
| H | -2.86393100 | -1.95317300 | 1.75576800  |
| H | -2.86560100 | 2.60377300  | -0.85025100 |
| H | -3.68968200 | -1.57088100 | -0.49989100 |
| H | -4.02274400 | 0.71192200  | -1.35055000 |
| H | -2.44648200 | 0.07015300  | -1.69805500 |
| C | -0.38278300 | -0.60460400 | -0.19563500 |
| C | -1.01937400 | -1.67082700 | 0.66868200  |
| H | -1.14278600 | -2.60060000 | 0.10277200  |
| H | -0.38584600 | -1.89343500 | 1.53668500  |
| H | -0.35959100 | 0.79748400  | 1.37626400  |
| H | -0.52847100 | -0.70712600 | -1.27013500 |
| N | 2.18259200  | 0.22030700  | 1.27579000  |
| N | 2.00259400  | 2.47371200  | 0.68932800  |
| H | 1.70452100  | 3.13941700  | -0.01030500 |
| H | 1.69692600  | 2.67455200  | 1.63170800  |
| C | 1.57944900  | -2.67957300 | -0.79420200 |



|   |            |             |             |
|---|------------|-------------|-------------|
| H | 0.90539800 | -2.78071400 | -1.64814900 |
| H | 2.56332300 | -3.05374700 | -1.09182400 |
| H | 1.21555200 | -3.28590500 | 0.03683000  |

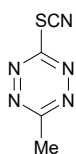

|   |             |             |             |
|---|-------------|-------------|-------------|
| C | 0.27331900  | -0.40090900 | 0.00000200  |
| C | -2.18601500 | 0.22123300  | -0.00000700 |
| N | -1.86926600 | -1.08714500 | -0.00000900 |
| N | -1.28837800 | 1.21336500  | -0.00002200 |
| N | -0.60481900 | -1.40878800 | -0.00001100 |
| N | -0.01319200 | 0.89401000  | 0.00000100  |
| S | 1.96062100  | -0.96321300 | 0.00000700  |
| C | 2.76134100  | 0.53871500  | 0.00000200  |
| N | 3.39870500  | 1.50526500  | 0.00000000  |
| C | -3.63706800 | 0.57776300  | 0.00001800  |
| H | -4.12552400 | 0.15593900  | -0.88223800 |
| H | -4.12546000 | 0.15609300  | 0.88238500  |
| H | -3.74977700 | 1.66161000  | -0.00006400 |

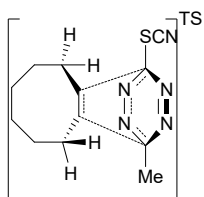

|   |             |             |             |
|---|-------------|-------------|-------------|
| C | -1.86520700 | 0.19109800  | -0.23319100 |
| C | -0.59293800 | 2.31760400  | -0.09658400 |
| N | -1.11331300 | 1.99412100  | -1.31605800 |
| N | -1.20790000 | 1.89823500  | 1.04873500  |
| N | -1.76964500 | 0.88786400  | -1.39014800 |
| C | 0.38738100  | -0.48008000 | -0.08855700 |
| C | 0.55667000  | -1.45810700 | -1.21157600 |
| C | 2.84059700  | -0.08206900 | 1.41081300  |
| C | 1.93968300  | -2.12826000 | -0.99404300 |
| C | 3.73601200  | -0.62096600 | 0.28090200  |
| C | 3.13559500  | -1.15263200 | -1.04504400 |
| H | 0.54562200  | -0.93945700 | -2.17816500 |
| H | 1.92597400  | -2.66709400 | -0.03760700 |
| H | 2.22032000  | -0.89954500 | 1.79619400  |
| H | 4.32312800  | -1.43512500 | 0.72418200  |
| H | -0.22258000 | -2.22551300 | -1.22648900 |
| H | 3.49719900  | 0.21414400  | 2.23784600  |
| H | 2.06345200  | -2.89064500 | -1.77077100 |
| H | 4.46496600  | 0.15517600  | 0.01223400  |
| H | 3.96240700  | -1.66062400 | -1.55446500 |

|   |             |             |             |
|---|-------------|-------------|-------------|
| H | 2.87661000  | -0.31403200 | -1.70129100 |
| C | 1.06287000  | 0.70993400  | -0.11884800 |
| C | 1.90867600  | 1.10110200  | 1.07094800  |
| H | 2.49493400  | 1.99846900  | 0.84611600  |
| H | 1.28302100  | 1.32189400  | 1.94534000  |
| H | 0.20067500  | -0.92321600 | 0.89220800  |
| H | 1.38329400  | 1.07318800  | -1.09474700 |
| N | -1.87590200 | 0.80014000  | 0.97817600  |
| S | -2.78971800 | -1.33242500 | -0.42021100 |
| C | -2.20692300 | -2.13800600 | 0.96081000  |
| N | -1.80715400 | -2.73950700 | 1.86736400  |
| C | 0.22655400  | 3.56783900  | -0.01667800 |
| H | 0.97954300  | 3.58278700  | -0.80726800 |
| H | -0.42507600 | 4.43665400  | -0.15045900 |
| H | 0.70558300  | 3.64103200  | 0.96031300  |

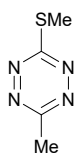

|   |             |             |             |
|---|-------------|-------------|-------------|
| C | -0.51570900 | -0.27708200 | 0.00009100  |
| C | 2.00832500  | 0.12019200  | -0.00003300 |
| N | 1.56823700  | -1.15600200 | 0.00008000  |
| N | 1.21043600  | 1.18647300  | 0.00014200  |
| N | 0.28572100  | -1.36295500 | 0.00013900  |
| N | -0.09275700 | 0.98594700  | 0.00020300  |
| S | -2.23134700 | -0.63641000 | -0.00010100 |
| C | -2.90163100 | 1.04801500  | -0.00007600 |
| H | -3.98673500 | 0.93352500  | -0.00023200 |
| H | -2.58364300 | 1.59063000  | 0.89013900  |
| H | -2.58340100 | 1.59076000  | -0.89012400 |
| C | 3.48842500  | 0.33435500  | -0.00021000 |
| H | 3.93626500  | -0.13091400 | 0.88192000  |
| H | 3.93607500  | -0.13116000 | -0.88230700 |
| H | 3.70507600  | 1.40259700  | -0.00037000 |

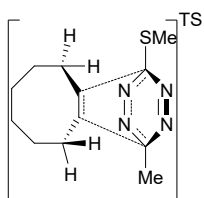

|   |             |             |             |
|---|-------------|-------------|-------------|
| C | -1.85595100 | -0.04719000 | -0.20884200 |
| C | -0.63035000 | 2.13032400  | -0.28923000 |
| N | -1.12297400 | 1.65542300  | -1.48026300 |
| N | -1.28040300 | 1.84010100  | 0.87520700  |
| N | -1.74941000 | 0.53944500  | -1.44360700 |
| C | 0.37608000  | -0.56344800 | -0.00901600 |

|   |             |             |             |
|---|-------------|-------------|-------------|
| C | 0.62788100  | -1.59671000 | -1.06491300 |
| C | 2.78395500  | 0.02703500  | 1.51590000  |
| C | 2.02720300  | -2.19894500 | -0.77539400 |
| C | 3.73029200  | -0.54289200 | 0.44401400  |
| C | 3.18911100  | -1.18464800 | -0.85875700 |
| H | 0.62981000  | -1.12996400 | -2.05776800 |
| H | 2.01397000  | -2.67964300 | 0.21221900  |
| H | 2.18819000  | -0.79188500 | 1.93629400  |
| H | 4.34077400  | -1.29987600 | 0.95278600  |
| H | -0.12892500 | -2.38614300 | -1.06003200 |
| H | 3.40719100  | 0.39915900  | 2.33847400  |
| H | 2.20057300  | -3.00176700 | -1.50050600 |
| H | 4.43172700  | 0.24680700  | 0.14336500  |
| H | 4.04923900  | -1.69338200 | -1.30920600 |
| H | 2.91936300  | -0.40241600 | -1.57677200 |
| C | 1.00899400  | 0.65267900  | -0.09745100 |
| C | 1.81480400  | 1.14652000  | 1.08239500  |
| H | 2.37157500  | 2.05121100  | 0.81502700  |
| H | 1.15937800  | 1.39816500  | 1.92582900  |
| H | 0.19415900  | -0.95683600 | 0.99342000  |
| H | 1.36872200  | 0.93967100  | -1.08443900 |
| N | -1.90711000 | 0.71620200  | 0.91910500  |
| S | -2.68679100 | -1.60801200 | -0.20943800 |
| C | -2.85184200 | -1.86545100 | 1.57804400  |
| H | -3.30421300 | -2.85151400 | 1.69659300  |
| H | -1.87684300 | -1.85161900 | 2.06901000  |
| H | -3.48989100 | -1.10209700 | 2.02108100  |
| C | 0.11978500  | 3.42771900  | -0.34524600 |
| H | 0.91082800  | 3.38232600  | -1.09713300 |
| H | -0.56517500 | 4.23477000  | -0.62157100 |
| H | 0.54770300  | 3.65507400  | 0.63222900  |

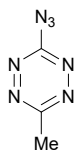

|   |             |             |             |
|---|-------------|-------------|-------------|
| C | -0.57515800 | 0.44839800  | -0.00003500 |
| C | 1.89328300  | -0.17798100 | 0.00000100  |
| N | 1.00029500  | -1.17054500 | 0.00003300  |
| N | 1.56818600  | 1.12962200  | 0.00003000  |
| N | -0.27281600 | -0.85065200 | 0.00000900  |
| N | 0.30892400  | 1.45930200  | -0.00000500 |
| N | -1.90877800 | 0.85008700  | -0.00001700 |
| N | -2.72624300 | -0.09523600 | 0.00005200  |
| N | -3.55988800 | -0.84467600 | -0.00003700 |
| C | 3.34762400  | -0.52563200 | -0.00001400 |
| H | 3.83520500  | -0.10288600 | -0.88235300 |

|   |            |             |            |
|---|------------|-------------|------------|
| H | 3.83544100 | -0.10218700 | 0.88184700 |
| H | 3.46710800 | -1.60896100 | 0.00034500 |

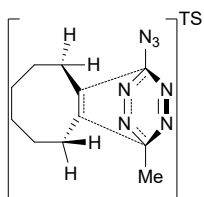

|   |             |             |             |
|---|-------------|-------------|-------------|
| C | -1.86622300 | 0.10489100  | 0.46904200  |
| C | -0.67417600 | 2.10384200  | -0.41221100 |
| N | -1.42546700 | 1.39745400  | -1.30897300 |
| N | -1.04530600 | 2.13959900  | 0.90636200  |
| N | -2.04444800 | 0.36668600  | -0.85662500 |
| C | 0.32268800  | -0.50278500 | 0.37609200  |
| C | 0.28319800  | -1.83019800 | -0.32069400 |
| C | 3.04906000  | 0.26177100  | 1.04936800  |
| C | 1.70021500  | -2.44813800 | -0.19705300 |
| C | 3.68455800  | -0.67955100 | 0.01095600  |
| C | 2.81750000  | -1.61823700 | -0.86541900 |
| H | 0.02992900  | -1.70292400 | -1.38075700 |
| H | 1.92800500  | -2.60578900 | 0.86550000  |
| H | 2.55765700  | -0.33972800 | 1.82325400  |
| H | 4.39031000  | -1.30997900 | 0.56663800  |
| H | -0.44526900 | -2.51153900 | 0.13043300  |
| H | 3.86521500  | 0.79354300  | 1.55357300  |
| H | 1.66988700  | -3.44405000 | -0.65235800 |
| H | 4.30040600  | -0.08069900 | -0.67312000 |
| H | 3.52314800  | -2.31594700 | -1.33071000 |
| H | 2.38589300  | -1.05762400 | -1.70189500 |
| C | 0.94459700  | 0.56406200  | -0.22393100 |
| C | 2.02779600  | 1.29729400  | 0.53369800  |
| H | 2.51984800  | 2.03127400  | -0.11335000 |
| H | 1.60749800  | 1.83840500  | 1.39112700  |
| H | 0.36515200  | -0.55670700 | 1.46569700  |
| H | 1.04484400  | 0.52884500  | -1.30795200 |
| N | -1.66107900 | 1.11235200  | 1.36560700  |
| N | -2.45244400 | -1.04764500 | 1.01885100  |
| N | -2.92934300 | -1.82798400 | 0.17407100  |
| N | -3.39124500 | -2.61485000 | -0.48206500 |
| C | 0.07084800  | 3.29210200  | -0.94154400 |
| H | -0.64024700 | 4.07157100  | -1.23081800 |
| H | 0.73036500  | 3.69435000  | -0.17133200 |
| H | 0.65231100  | 3.01739600  | -1.82434200 |

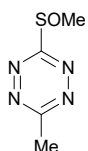

|   |             |             |             |
|---|-------------|-------------|-------------|
| C | -0.24821200 | -0.02672900 | -0.18807600 |
| C | 2.27812400  | -0.00508100 | 0.04055000  |
| N | 1.67574300  | 1.14525400  | -0.29896200 |
| N | 1.63730800  | -1.16434300 | 0.25804700  |
| N | 0.36984400  | 1.12776200  | -0.42090100 |
| N | 0.33029300  | -1.17853800 | 0.13743800  |
| S | -2.05994200 | -0.04154900 | -0.44480400 |
| O | -2.58648500 | -1.32579400 | 0.10102100  |
| C | -2.37839100 | 1.25778100  | 0.78751600  |
| H | -3.45025300 | 1.45980900  | 0.75624000  |
| H | -2.10069300 | 0.87692300  | 1.77268400  |
| H | -1.80997100 | 2.15175200  | 0.52548400  |
| C | 3.76656200  | -0.00588200 | 0.17667000  |
| H | 4.14804900  | 1.01028100  | 0.07895400  |
| H | 4.05304300  | -0.42256000 | 1.14506600  |
| H | 4.20995700  | -0.63654500 | -0.59903300 |

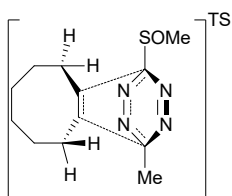

|   |             |             |             |
|---|-------------|-------------|-------------|
| C | -1.66778100 | 0.19158400  | -0.17541900 |
| C | -0.39444200 | 2.31972400  | -0.29315400 |
| N | -0.92777600 | 1.86589700  | -1.45963700 |
| N | -0.99137500 | 2.03392100  | 0.89920000  |
| N | -1.58810800 | 0.75547300  | -1.39857700 |
| C | 0.56474100  | -0.53526300 | 0.00294100  |
| C | 0.70984200  | -1.61281500 | -1.03084300 |
| C | 3.00940800  | -0.04236700 | 1.47988200  |
| C | 2.08085000  | -2.28382200 | -0.74555900 |
| C | 3.89824100  | -0.70200800 | 0.40944600  |
| C | 3.29654600  | -1.33917100 | -0.86944900 |
| H | 0.70841300  | -1.18885700 | -2.04247700 |
| H | 2.04860300  | -2.73636100 | 0.25395200  |
| H | 2.36847900  | -0.80767000 | 1.93249200  |
| H | 4.46421500  | -1.48518500 | 0.92974500  |
| H | -0.07620700 | -2.36907100 | -0.96019700 |
| H | 3.66891700  | 0.31419600  | 2.28073000  |
| H | 2.19728300  | -3.11358400 | -1.45132500 |
| H | 4.64659500  | 0.03037800  | 0.07790000  |
| H | 4.11777500  | -1.90694700 | -1.32214000 |
| H | 3.06086800  | -0.55761800 | -1.60043200 |

|   |             |             |             |
|---|-------------|-------------|-------------|
| C | 1.26527600  | 0.62917600  | -0.13202700 |
| C | 2.10165900  | 1.12124700  | 1.02443900  |
| H | 2.70529700  | 1.98494900  | 0.72476300  |
| H | 1.47169600  | 1.43119100  | 1.86827600  |
| H | 0.33589100  | -0.89312000 | 1.00839400  |
| H | 1.59462500  | 0.90152300  | -1.13432500 |
| N | -1.65234500 | 0.92820700  | 0.95877800  |
| S | -2.46786400 | -1.44714400 | -0.10662200 |
| O | -1.81616900 | -2.21567200 | 1.00876900  |
| C | -4.03843200 | -0.81979300 | 0.55035100  |
| H | -4.68238000 | -1.68673100 | 0.70768700  |
| H | -3.83149800 | -0.31516400 | 1.49560300  |
| H | -4.48702500 | -0.13684200 | -0.17514900 |
| C | 0.47180100  | 3.53769300  | -0.35799800 |
| H | 1.21439700  | 3.43510100  | -1.15185500 |
| H | -0.14609200 | 4.41301000  | -0.58094000 |
| H | 0.96628800  | 3.69689300  | 0.60109800  |

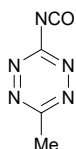

|   |             |             |             |
|---|-------------|-------------|-------------|
| C | 0.51993500  | 0.38259800  | -0.00003700 |
| C | -1.97076500 | -0.15759800 | 0.00003100  |
| N | -1.60272900 | 1.13405600  | 0.00010600  |
| N | -1.10934400 | -1.18256500 | 0.00003200  |
| N | -0.32819600 | 1.41852800  | 0.00006000  |
| N | 0.17078900  | -0.90879200 | -0.00002600 |
| N | 1.86245700  | 0.69827700  | -0.00020300 |
| C | 2.83569000  | -0.03868000 | -0.00001700 |
| O | 3.84436600  | -0.61120900 | 0.00010700  |
| C | -3.43493100 | -0.46037000 | -0.00003100 |
| H | -3.90835600 | -0.02230300 | -0.88258000 |
| H | -3.58823900 | -1.53936000 | 0.00069400  |
| H | -3.90874400 | -0.02089800 | 0.88157400  |

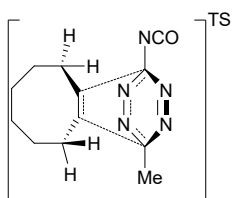

|   |             |             |             |
|---|-------------|-------------|-------------|
| C | -1.88683900 | 0.02345000  | -0.30911500 |
| C | -0.66210500 | 2.18852700  | -0.19505100 |
| N | -1.11278000 | 1.79955700  | -1.42648700 |
| N | -1.34160900 | 1.81409600  | 0.92817500  |
| N | -1.74534200 | 0.68338600  | -1.49136900 |
| C | 0.30865600  | -0.55878100 | -0.04850500 |

|   |             |             |             |
|---|-------------|-------------|-------------|
| C | 0.52929200  | -1.56127200 | -1.14128300 |
| C | 2.69818300  | -0.12830500 | 1.54806000  |
| C | 1.89738200  | -2.23123700 | -0.85125300 |
| C | 3.63862100  | -0.69354400 | 0.46812100  |
| C | 3.09594000  | -1.25687200 | -0.87007700 |
| H | 0.56607200  | -1.05880900 | -2.11544400 |
| H | 1.84551200  | -2.75087100 | 0.11496100  |
| H | 2.06239200  | -0.93775400 | 1.92573500  |
| H | 4.20709500  | -1.49627500 | 0.95474300  |
| H | -0.26203900 | -2.31562200 | -1.17970900 |
| H | 3.32149800  | 0.18496000  | 2.39450700  |
| H | 2.05517700  | -3.00926400 | -1.60613900 |
| H | 4.37820900  | 0.07682100  | 0.21228900  |
| H | 3.94474100  | -1.77567000 | -1.33012800 |
| H | 2.86613000  | -0.43385700 | -1.55592400 |
| C | 0.98644300  | 0.63199000  | -0.07034700 |
| C | 1.78086100  | 1.04664200  | 1.14593200  |
| H | 2.37492600  | 1.94109100  | 0.93000100  |
| H | 1.11738500  | 1.28397300  | 1.98746700  |
| H | 0.08386600  | -0.98300000 | 0.93310000  |
| H | 1.35672800  | 0.96895400  | -1.03761000 |
| N | -1.97973700 | 0.70011900  | 0.87144600  |
| N | -2.48019700 | -1.23013800 | -0.37933500 |
| C | -2.95849300 | -1.91903500 | 0.50348800  |
| O | -3.44043900 | -2.68262500 | 1.23704200  |
| C | 0.12180900  | 3.46377700  | -0.12910000 |
| H | -0.53841900 | 4.31058500  | -0.33911800 |
| H | 0.54448000  | 3.59301400  | 0.86828900  |
| H | 0.91889200  | 3.46154400  | -0.87559200 |

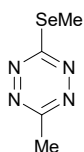

|    |             |             |             |
|----|-------------|-------------|-------------|
| C  | -0.03403000 | -0.16301400 | -0.00004600 |
| C  | 2.50780700  | 0.09635800  | -0.00004800 |
| N  | 1.76872800  | 1.20574500  | -0.00008900 |
| N  | 2.00029600  | -1.15312700 | -0.00013600 |
| N  | 0.45778000  | 1.07391100  | -0.00003700 |
| N  | 0.70659900  | -1.28901400 | -0.00016400 |
| Se | -1.89626800 | -0.42922900 | 0.00007200  |
| C  | -2.40913500 | 1.44426800  | -0.00006400 |
| H  | -2.02137600 | 1.92682800  | 0.89460400  |
| H  | -2.02067100 | 1.92679800  | -0.89444700 |
| H  | -3.49924300 | 1.45555000  | -0.00052400 |
| C  | 3.99721600  | 0.23097700  | 0.00017200  |
| H  | 4.41915900  | -0.25751900 | 0.88249800  |

|   |            |             |             |
|---|------------|-------------|-------------|
| H | 4.41955300 | -0.25806200 | -0.88164500 |
| H | 4.27071500 | 1.28605600  | -0.00002400 |

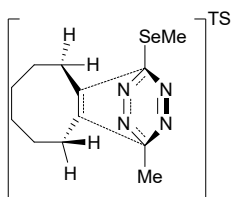

|    |             |             |             |
|----|-------------|-------------|-------------|
| C  | 1.40896700  | 0.59707900  | -0.15180200 |
| C  | -0.29029100 | 2.34561900  | 0.38801600  |
| N  | 0.49649800  | 1.91797000  | 1.41983700  |
| N  | 0.20907900  | 2.35199600  | -0.88894900 |
| N  | 1.36921800  | 1.01248400  | 1.14455000  |
| C  | -0.60953700 | -0.47606800 | -0.18486900 |
| C  | -0.40061900 | -1.69235800 | 0.66501400  |
| C  | -3.31567600 | -0.38985200 | -1.25173400 |
| C  | -1.62865200 | -2.61254900 | 0.45046000  |
| C  | -3.88497100 | -1.34726600 | -0.19024200 |
| C  | -2.97379400 | -1.99094300 | 0.88458400  |
| H  | -0.33658900 | -1.41162400 | 1.72432500  |
| H  | -1.67070900 | -2.91034400 | -0.60575500 |
| H  | -2.60905000 | -0.93926600 | -1.88492300 |
| H  | -4.36427300 | -2.16386500 | -0.74515900 |
| H  | 0.51524000  | -2.21937900 | 0.37982800  |
| H  | -4.14441500 | -0.09729300 | -1.90823500 |
| H  | -1.45850900 | -3.53388600 | 1.01849600  |
| H  | -4.69805000 | -0.83580600 | 0.34205600  |
| H  | -3.57909300 | -2.78018700 | 1.34523900  |
| H  | -2.78461500 | -1.27484500 | 1.69189000  |
| C  | -1.50892300 | 0.48432300  | 0.20870400  |
| C  | -2.60978600 | 0.88594800  | -0.74771000 |
| H  | -3.32709500 | 1.54790200  | -0.25057700 |
| H  | -2.19996400 | 1.42819100  | -1.60943900 |
| H  | -0.49647200 | -0.64543800 | -1.25803800 |
| H  | -1.74593500 | 0.52714900  | 1.27097300  |
| N  | 1.07818600  | 1.45225400  | -1.16981900 |
| Se | 2.61504000  | -0.78505000 | -0.63298600 |
| C  | 3.24004100  | -1.20875000 | 1.15816700  |
| H  | 3.79877500  | -0.36187700 | 1.55027900  |
| H  | 2.39805100  | -1.44071900 | 1.80901800  |
| H  | 3.88839000  | -2.07873700 | 1.04909400  |
| C  | -1.33034300 | 3.37478200  | 0.71541600  |
| H  | -0.84145400 | 4.31231000  | 0.99648300  |
| H  | -1.96143100 | 3.56091600  | -0.15474100 |
| H  | -1.94352800 | 3.04577800  | 1.55736200  |



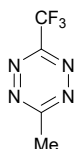

|   |             |             |             |
|---|-------------|-------------|-------------|
| C | -0.30578800 | 0.03344900  | -0.00006000 |
| C | 2.22950300  | 0.00675600  | -0.00002400 |
| N | 1.61903000  | 1.19662800  | -0.00008400 |
| N | 1.58993400  | -1.17960700 | -0.00007800 |
| N | 0.30283200  | 1.21002000  | -0.00005100 |
| N | 0.28564000  | -1.16426400 | -0.00008400 |
| C | -1.82357600 | 0.00518200  | -0.00002300 |
| F | -2.26798000 | -0.64091300 | 1.07952000  |
| F | -2.33062300 | 1.23163100  | -0.00004500 |
| F | -2.26816800 | -0.64108600 | -1.07929000 |
| C | 3.72286200  | -0.02270700 | 0.00009700  |
| H | 4.08386200  | -0.55762500 | 0.88247900  |
| H | 4.08399200  | -0.55923300 | -0.88124400 |
| H | 4.11302300  | 0.99464600  | -0.00075500 |

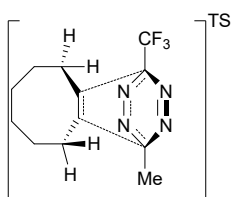

|   |             |             |             |
|---|-------------|-------------|-------------|
| C | -1.70895600 | 0.20934400  | 0.00665400  |
| C | -0.40510800 | 2.28964800  | -0.35419400 |
| N | -1.00761100 | 1.74907300  | -1.45066800 |
| N | -0.94004900 | 2.11547900  | 0.88852400  |
| N | -1.68398400 | 0.66713500  | -1.26516100 |
| C | 0.52129600  | -0.52364100 | 0.13424300  |
| C | 0.58625200  | -1.71261300 | -0.78063800 |
| C | 3.09627100  | 0.07112900  | 1.34475700  |
| C | 1.97527000  | -2.36374600 | -0.54567300 |
| C | 3.89103300  | -0.69777500 | 0.27435100  |
| C | 3.17746200  | -1.45268300 | -0.87559800 |
| H | 0.49761900  | -1.39748400 | -1.82745700 |
| H | 2.03492400  | -2.70860400 | 0.49522900  |
| H | 2.49345400  | -0.64032400 | 1.92134500  |
| H | 4.50036500  | -1.43028600 | 0.81881200  |
| H | -0.19745300 | -2.44500100 | -0.57799100 |
| H | 3.81995400  | 0.49652300  | 2.05077100  |
| H | 2.02605200  | -3.26506000 | -1.16625400 |
| H | 4.60700000  | -0.00780200 | -0.19179600 |
| H | 3.95244900  | -2.07315400 | -1.33999500 |
| H | 2.87833200  | -0.74643500 | -1.65802800 |
| C | 1.22116000  | 0.60972000  | -0.17440600 |
| C | 2.15909700  | 1.19579600  | 0.85445400  |

|   |             |             |             |
|---|-------------|-------------|-------------|
| H | 2.74025900  | 2.01730000  | 0.42207800  |
| H | 1.60490500  | 1.59608000  | 1.71329300  |
| H | 0.39016100  | -0.75682200 | 1.19233900  |
| H | 1.47027200  | 0.77154800  | -1.22242300 |
| N | -1.61683500 | 1.03554700  | 1.07499000  |
| C | -2.46790600 | -1.07708100 | 0.25377500  |
| F | -3.73204900 | -0.82361200 | 0.59764300  |
| F | -2.48074600 | -1.84557300 | -0.83530100 |
| F | -1.91068000 | -1.77611700 | 1.25102000  |
| C | 0.46037700  | 3.49080000  | -0.57083000 |
| H | -0.16868100 | 4.34539100  | -0.83828200 |
| H | 1.00354200  | 3.73279500  | 0.34348000  |
| H | 1.15998700  | 3.31502000  | -1.39054400 |

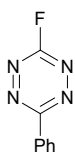

|   |             |             |             |
|---|-------------|-------------|-------------|
| C | -2.91026700 | -0.00002200 | 0.00019500  |
| C | -0.38154400 | -0.00003600 | -0.00019300 |
| N | -1.01630900 | 1.18455200  | -0.00003100 |
| N | -2.32435400 | 1.18703600  | 0.00011200  |
| N | -1.01629600 | -1.18456300 | -0.00009100 |
| N | -2.32439500 | -1.18703800 | -0.00002000 |
| C | 1.09510100  | -0.00000700 | -0.00009100 |
| C | 1.79531000  | -1.21096400 | -0.00000500 |
| C | 1.79528400  | 1.21095700  | -0.00008000 |
| C | 3.18483000  | -1.20650200 | 0.00008000  |
| H | 1.24417500  | -2.14461000 | -0.00000700 |
| C | 3.18481100  | 1.20651900  | 0.00001200  |
| H | 1.24414400  | 2.14460000  | -0.00014700 |
| C | 3.88165300  | 0.00001800  | 0.00009100  |
| H | 3.72498100  | -2.14772600 | 0.00014300  |
| H | 3.72493800  | 2.14775700  | 0.00001800  |
| H | 4.96724700  | 0.00002400  | 0.00016200  |
| F | -4.22300900 | 0.00003100  | 0.00000000  |

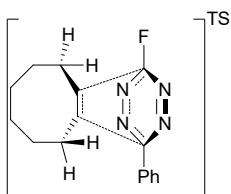

|   |             |             |             |
|---|-------------|-------------|-------------|
| C | -1.21384500 | -2.34217800 | -0.16929400 |
| C | 0.98224200  | -1.23212800 | 0.02135200  |
| N | 0.48158300  | -1.80312600 | 1.15713200  |
| N | 0.66101700  | -1.74863600 | -1.20031500 |
| N | -0.65479400 | -2.39974600 | 1.05809200  |

|   |             |             |             |
|---|-------------|-------------|-------------|
| C | -1.78494200 | -0.19789500 | -0.22229900 |
| C | -2.89796000 | -0.13778100 | 0.78484700  |
| C | -1.23468700 | 2.40334800  | -1.41113800 |
| C | -3.55494200 | 1.25667700  | 0.62461900  |
| C | -1.92131400 | 3.17449300  | -0.26896000 |
| C | -2.60352800 | 2.43951500  | 0.91315900  |
| H | -2.49838500 | -0.24078100 | 1.80101400  |
| H | -3.97179600 | 1.34242600  | -0.38781400 |
| H | -1.99236100 | 1.82892900  | -1.95724000 |
| H | -2.68221900 | 3.80548000  | -0.74578400 |
| H | -3.63734100 | -0.92793400 | 0.62848600  |
| H | -0.84718500 | 3.14406500  | -2.12116700 |
| H | -4.40849100 | 1.30628700  | 1.30957700  |
| H | -1.19323400 | 3.87051600  | 0.16818400  |
| H | -3.17574500 | 3.21108300  | 1.44107200  |
| H | -1.84635000 | 2.11105000  | 1.63398800  |
| C | -0.62195200 | 0.48532400  | 0.01171500  |
| C | -0.09160000 | 1.43726700  | -1.02797400 |
| H | 0.77625700  | 1.98180300  | -0.64239600 |
| H | 0.23327900  | 0.89753100  | -1.92765100 |
| H | -2.11294600 | -0.27450000 | -1.26151500 |
| H | -0.35872500 | 0.68887500  | 1.04899100  |
| N | -0.47460500 | -2.34625900 | -1.29937600 |
| C | 2.21142400  | -0.41916200 | 0.13332800  |
| C | 2.94693500  | -0.09173400 | -1.00961600 |
| C | 2.61341500  | 0.06657100  | 1.38121900  |
| C | 4.07522900  | 0.71400000  | -0.90084200 |
| H | 2.63039600  | -0.47866100 | -1.97227400 |
| C | 3.74177500  | 0.87207300  | 1.48245200  |
| H | 2.04022300  | -0.19974500 | 2.26347600  |
| C | 4.47402000  | 1.19904800  | 0.34262600  |
| H | 4.64552200  | 0.96249200  | -1.79034200 |
| H | 4.05121100  | 1.24497400  | 2.45374200  |
| H | 5.35419600  | 1.82923200  | 0.42400600  |
| F | -2.42448100 | -2.86481900 | -0.27625100 |

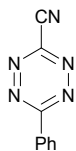

|   |            |             |             |
|---|------------|-------------|-------------|
| C | 2.63879000 | -0.00003900 | 0.00011000  |
| C | 0.09152900 | -0.00004200 | -0.00041300 |
| N | 0.72670400 | 1.18801500  | -0.00026600 |
| N | 2.03046900 | 1.19193800  | -0.00010200 |
| N | 0.72668000 | -1.18804300 | -0.00012800 |
| N | 2.03049800 | -1.19196200 | 0.00007300  |

|   |             |             |             |
|---|-------------|-------------|-------------|
| C | -1.37975800 | -0.00000600 | -0.00017500 |
| C | -2.07920200 | -1.21292700 | -0.00012500 |
| C | -2.07916600 | 1.21292500  | -0.00000200 |
| C | -3.46803100 | -1.20784800 | 0.00008800  |
| H | -1.52746200 | -2.14614000 | -0.00026100 |
| C | -3.46800300 | 1.20788200  | 0.00020000  |
| H | -1.52741500 | 2.14613100  | -0.00003900 |
| C | -4.16345800 | 0.00002900  | 0.00024800  |
| H | -4.00934400 | -2.14820400 | 0.00012400  |
| H | -4.00928200 | 2.14825800  | 0.00032400  |
| H | -5.24903800 | 0.00003900  | 0.00041000  |
| C | 4.08326400  | 0.00000600  | 0.00018000  |
| N | 5.23804000  | 0.00005700  | 0.00024800  |

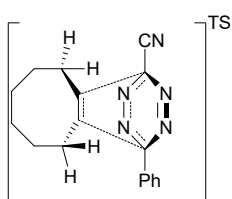

|   |             |             |             |
|---|-------------|-------------|-------------|
| C | -1.47592800 | -2.09156800 | -0.10314300 |
| C | 0.87879600  | -1.30944200 | 0.05182700  |
| N | 0.31117100  | -1.78514400 | 1.20440600  |
| N | 0.47705900  | -1.80916200 | -1.15701500 |
| N | -0.90351700 | -2.19050300 | 1.13175000  |
| C | -1.68688900 | 0.19725500  | -0.18673800 |
| C | -2.72988500 | 0.50455500  | 0.84738600  |
| C | -0.67011400 | 2.60180200  | -1.46834900 |
| C | -3.09564000 | 2.00091600  | 0.66177200  |
| C | -1.14790600 | 3.52899900  | -0.33644900 |
| C | -1.92090100 | 2.97790000  | 0.88829100  |
| H | -2.32527500 | 0.34864800  | 1.85484500  |
| H | -3.52186800 | 2.14329600  | -0.34009900 |
| H | -1.54513300 | 2.17476500  | -1.97276200 |
| H | -1.78451400 | 4.28500500  | -0.81331100 |
| H | -3.62543700 | -0.11348300 | 0.73592100  |
| H | -0.16684500 | 3.22723300  | -2.21552000 |
| H | -3.89931000 | 2.23349100  | 1.36855000  |
| H | -0.28075200 | 4.07746400  | 0.05432200  |
| H | -2.31271700 | 3.86115200  | 1.40545000  |
| H | -1.22031300 | 2.52582900  | 1.59935600  |
| C | -0.39974500 | 0.63225200  | 0.00072200  |
| C | 0.27158500  | 1.44081300  | -1.08111800 |
| H | 1.23738400  | 1.81754500  | -0.72948300 |
| H | 0.46301400  | 0.82637100  | -1.97099000 |
| H | -2.05079200 | 0.14543200  | -1.21542300 |
| H | -0.08493000 | 0.82338800  | 1.02569700  |
| N | -0.73673400 | -2.21306100 | -1.24438200 |

|   |             |             |             |
|---|-------------|-------------|-------------|
| C | 2.21857200  | -0.69667100 | 0.13976100  |
| C | 2.99505300  | -0.53259200 | -1.01160500 |
| C | 2.69301300  | -0.23805300 | 1.37290400  |
| C | 4.23653200  | 0.08792400  | -0.92566600 |
| H | 2.62079000  | -0.89992000 | -1.96111800 |
| C | 3.93378600  | 0.38290900  | 1.45041000  |
| H | 2.08665000  | -0.38093300 | 2.26167000  |
| C | 4.70659300  | 0.54885400  | 0.30213600  |
| H | 4.83917700  | 0.21039400  | -1.81994800 |
| H | 4.30000400  | 0.73659300  | 2.40891900  |
| H | 5.67524900  | 1.03477200  | 0.36528500  |
| C | -2.87443100 | -2.44095500 | -0.20313900 |
| N | -4.00502400 | -2.66590500 | -0.28266700 |

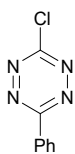

|    |             |             |             |
|----|-------------|-------------|-------------|
| C  | -2.50612000 | -0.00004000 | 0.00008700  |
| C  | 0.03764400  | -0.00004800 | 0.00022500  |
| N  | -0.59744200 | 1.18437000  | 0.00018100  |
| N  | -1.90456100 | 1.18815200  | 0.00012900  |
| N  | -0.59741600 | -1.18439900 | 0.00011200  |
| N  | -1.90460100 | -1.18817000 | 0.00001700  |
| C  | 1.51276000  | -0.00000900 | 0.00008700  |
| C  | 2.21277800  | -1.21145100 | 0.00006000  |
| C  | 2.21273800  | 1.21144500  | -0.00001200 |
| C  | 3.60212100  | -1.20687000 | -0.00006700 |
| H  | 1.66117000  | -2.14481000 | 0.00014000  |
| C  | 3.60209100  | 1.20690300  | -0.00012900 |
| H  | 1.66111900  | 2.14479600  | 0.00001000  |
| C  | 4.29856500  | 0.00003000  | -0.00015900 |
| H  | 4.14264000  | -2.14784000 | -0.00008800 |
| H  | 4.14257200  | 2.14789400  | -0.00020200 |
| H  | 5.38416200  | 0.00004000  | -0.00025400 |
| Cl | -4.22346900 | 0.00002900  | -0.00019000 |

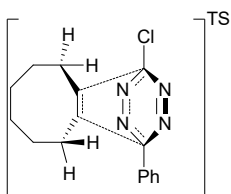

|   |             |             |             |
|---|-------------|-------------|-------------|
| C | -1.53492900 | -1.93871600 | -0.09477400 |
| C | 0.85136800  | -1.26617400 | 0.05594700  |
| N | 0.26196800  | -1.71158500 | 1.20779900  |
| N | 0.42298400  | -1.74237000 | -1.15159300 |
| N | -0.96941900 | -2.07177000 | 1.13308300  |

|    |             |             |             |
|----|-------------|-------------|-------------|
| C  | -1.61576700 | 0.33466000  | -0.15517400 |
| C  | -2.60043000 | 0.71257800  | 0.91242200  |
| C  | -0.52740800 | 2.67635100  | -1.50515500 |
| C  | -2.90439700 | 2.22088700  | 0.71563100  |
| C  | -0.92274600 | 3.64167300  | -0.37319500 |
| C  | -1.68025000 | 3.14745400  | 0.88524600  |
| H  | -2.16319700 | 0.55323200  | 1.90570900  |
| H  | -3.35771200 | 2.36820400  | -0.27375800 |
| H  | -1.43815000 | 2.28480000  | -1.97383200 |
| H  | -1.53771000 | 4.42087500  | -0.84127700 |
| H  | -3.52684200 | 0.13549700  | 0.85071600  |
| H  | -0.02002300 | 3.26658700  | -2.27791500 |
| H  | -3.67133600 | 2.50248900  | 1.44542800  |
| H  | -0.01770800 | 4.15302000  | -0.01964800 |
| H  | -2.01522800 | 4.05695800  | 1.39711300  |
| H  | -0.97823700 | 2.67710900  | 1.58268900  |
| C  | -0.30692300 | 0.71997300  | -0.01488900 |
| C  | 0.36922500  | 1.47652900  | -1.13003300 |
| H  | 1.36349900  | 1.81037700  | -0.81648100 |
| H  | 0.49959400  | 0.83963300  | -2.01499800 |
| H  | -2.01918300 | 0.29441000  | -1.16931300 |
| H  | 0.04567000  | 0.91948800  | 0.99597200  |
| N  | -0.80816700 | -2.09802500 | -1.23267500 |
| C  | 2.22893500  | -0.73687400 | 0.14391900  |
| C  | 3.01484400  | -0.61942500 | -1.00636600 |
| C  | 2.73207500  | -0.31058000 | 1.37676300  |
| C  | 4.29339100  | -0.07911900 | -0.91960600 |
| H  | 2.61773800  | -0.95957800 | -1.95672300 |
| C  | 4.01025200  | 0.22977400  | 1.45585700  |
| H  | 2.11758600  | -0.41574700 | 2.26521900  |
| C  | 4.79272900  | 0.34839300  | 0.30863400  |
| H  | 4.90203500  | 0.00673900  | -1.81421500 |
| H  | 4.39742600  | 0.55795000  | 2.41530600  |
| H  | 5.79040900  | 0.77149700  | 0.37248000  |
| Cl | -3.20823600 | -2.36597600 | -0.21765500 |

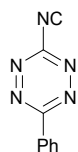

|   |             |             |             |
|---|-------------|-------------|-------------|
| C | -2.65816200 | 0.00027000  | -0.00070900 |
| C | -0.11350700 | 0.00026200  | 0.00445500  |
| N | -0.74960800 | 1.18589800  | -0.00025400 |
| N | -2.05396900 | 1.19152600  | -0.00078200 |
| N | -0.74966300 | -1.18551600 | -0.00019500 |
| N | -2.05381700 | -1.19112500 | -0.00074100 |
| N | -4.03102800 | -0.00013900 | -0.00019600 |

|   |             |             |             |
|---|-------------|-------------|-------------|
| C | -5.20911200 | -0.00062700 | -0.00086600 |
| C | 1.35982600  | 0.00009200  | 0.00190300  |
| C | 2.05938100  | -1.21216600 | 0.00083900  |
| C | 2.05969100  | 1.21217800  | 0.00086900  |
| C | 3.44853700  | -1.20750500 | -0.00089100 |
| H | 1.50774800  | -2.14552100 | 0.00143400  |
| C | 3.44883500  | 1.20715200  | -0.00085000 |
| H | 1.50826400  | 2.14565700  | 0.00149900  |
| C | 4.14471100  | -0.00027600 | -0.00169100 |
| H | 3.98923900  | -2.14832900 | -0.00158500 |
| H | 3.98980600  | 2.14782000  | -0.00150500 |
| H | 5.23033800  | -0.00040300 | -0.00302200 |

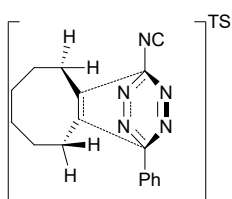

|   |             |             |             |
|---|-------------|-------------|-------------|
| C | -1.45359700 | -2.10435300 | -0.11359200 |
| C | 0.88446100  | -1.28368800 | 0.04563700  |
| N | 0.32363000  | -1.77448300 | 1.19439200  |
| N | 0.48898600  | -1.78037200 | -1.16577100 |
| N | -0.88167700 | -2.20703500 | 1.11879900  |
| C | -1.69120400 | 0.16105500  | -0.18497900 |
| C | -2.74265700 | 0.44379900  | 0.84676000  |
| C | -0.73060100 | 2.59283200  | -1.46235400 |
| C | -3.14706000 | 1.92989900  | 0.66099700  |
| C | -1.23537000 | 3.50678500  | -0.33133000 |
| C | -1.99739700 | 2.93550700  | 0.89098100  |
| H | -2.33701300 | 0.29805400  | 1.85530000  |
| H | -3.57371600 | 2.06208000  | -0.34214500 |
| H | -1.59301400 | 2.14459500  | -1.97004700 |
| H | -1.88975700 | 4.24662300  | -0.80957200 |
| H | -3.62160100 | -0.19746100 | 0.73324200  |
| H | -0.24073100 | 3.23156900  | -2.20720100 |
| H | -3.95817600 | 2.14233700  | 1.36571300  |
| H | -0.38370200 | 4.07702600  | 0.06234800  |
| H | -2.41172800 | 3.80835400  | 1.40831800  |
| H | -1.28740000 | 2.49968400  | 1.60288100  |
| C | -0.41608400 | 0.62898000  | 0.00513000  |
| C | 0.23832900  | 1.45507200  | -1.07356400 |
| H | 1.19411200  | 1.85438200  | -0.71952100 |
| H | 0.44642400  | 0.84630200  | -1.96355500 |
| H | -2.05327900 | 0.10436400  | -1.21407900 |
| H | -0.10645100 | 0.82471100  | 1.03083400  |
| N | -0.71559300 | -2.21134100 | -1.25434400 |
| C | 2.21985400  | -0.65925300 | 0.13805200  |

|   |             |             |             |
|---|-------------|-------------|-------------|
| C | 2.99551300  | -0.48005500 | -1.01141000 |
| C | 2.68972000  | -0.20359700 | 1.37384100  |
| C | 4.23125400  | 0.15140900  | -0.92096100 |
| H | 2.62521800  | -0.84443200 | -1.96361700 |
| C | 3.92491800  | 0.42816600  | 1.45615100  |
| H | 2.08423700  | -0.35734500 | 2.26139500  |
| C | 4.69699200  | 0.60871800  | 0.30977200  |
| H | 4.83284300  | 0.28526000  | -1.81437900 |
| H | 4.28702700  | 0.77913500  | 2.41726800  |
| H | 5.66106600  | 1.10321200  | 0.37652700  |
| N | -2.77840000 | -2.47473700 | -0.20918800 |
| C | -3.92256800 | -2.74005600 | -0.27861700 |

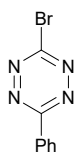

|    |             |             |             |
|----|-------------|-------------|-------------|
| C  | 1.80540400  | -0.00001200 | -0.00003600 |
| C  | -0.73904900 | -0.00000400 | -0.00009900 |
| N  | -0.10438800 | -1.18464400 | -0.00014500 |
| N  | -0.10436300 | 1.18464900  | -0.00013000 |
| N  | 1.20320000  | -1.18797800 | -0.00010700 |
| N  | 1.20320200  | 1.18797900  | -0.00009300 |
| C  | -2.21409800 | 0.00000600  | -0.00003000 |
| C  | -2.91412400 | 1.21145800  | -0.00000300 |
| C  | -2.91411900 | -1.21145000 | 0.00000600  |
| C  | -4.30345900 | 1.20690600  | 0.00006300  |
| H  | -2.36244600 | 2.14476200  | -0.00003500 |
| C  | -4.30345200 | -1.20690900 | 0.00007500  |
| H  | -2.36243300 | -2.14475000 | -0.00002000 |
| C  | -4.99989800 | -0.00000300 | 0.00010200  |
| H  | -4.84399300 | 2.14785900  | 0.00008400  |
| H  | -4.84398200 | -2.14786500 | 0.00010600  |
| H  | -6.08549100 | -0.00000700 | 0.00015500  |
| Br | 3.67461600  | 0.00000000  | 0.00007300  |

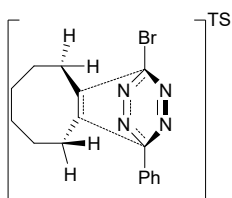

|   |             |             |             |
|---|-------------|-------------|-------------|
| C | -1.56327600 | -1.34742400 | -0.02956700 |
| C | 0.91607700  | -1.28828400 | 0.08315000  |
| N | 0.25227400  | -1.56138700 | 1.24812600  |
| N | 0.36532300  | -1.65691600 | -1.11249500 |
| N | -1.03166700 | -1.60462300 | 1.19330900  |
| C | -1.08454100 | 0.87521500  | -0.11757900 |



|    |             |             |             |
|----|-------------|-------------|-------------|
| C  | -1.91748600 | 1.50054100  | 0.96267900  |
| C  | 0.52123000  | 2.85379900  | -1.53050400 |
| C  | -1.84280000 | 3.03367700  | 0.74316200  |
| C  | 0.40357100  | 3.90289100  | -0.41010000 |
| C  | -0.42387500 | 3.63057100  | 0.87170000  |
| H  | -1.50808000 | 1.25089500  | 1.94927400  |
| H  | -2.26862400 | 3.27517800  | -0.23995800 |
| H  | -0.46856500 | 2.69427000  | -1.97461900 |
| H  | -0.00944100 | 4.80365900  | -0.88179600 |
| H  | -2.95782600 | 1.16738800  | 0.93013700  |
| H  | 1.14148200  | 3.28880400  | -2.32364800 |
| H  | -2.49896300 | 3.50664900  | 1.48199200  |
| H  | 1.41499300  | 4.17846800  | -0.08349100 |
| H  | -0.51161500 | 4.60220400  | 1.37135600  |
| H  | 0.15559000  | 3.01123800  | 1.56535700  |
| C  | 0.28181200  | 0.92475200  | -0.00870800 |
| C  | 1.10007600  | 1.47393500  | -1.14947500 |
| H  | 2.15270000  | 1.55450400  | -0.85982600 |
| H  | 1.04883900  | 0.81292400  | -2.02483800 |
| H  | -1.51123500 | 0.92302800  | -1.12186500 |
| H  | 0.69480500  | 1.04466600  | 0.99179400  |
| N  | -0.91701800 | -1.69385900 | -1.17442600 |
| C  | 2.38272600  | -1.11514900 | 0.14656600  |
| C  | 3.15457400  | -1.20789800 | -1.01547900 |
| C  | 2.99588100  | -0.81688800 | 1.36712800  |
| C  | 4.52874100  | -1.00344300 | -0.95257800 |
| H  | 2.66998600  | -1.44689800 | -1.95600700 |
| C  | 4.36964500  | -0.61230400 | 1.42233800  |
| H  | 2.38876000  | -0.75745800 | 2.26483100  |
| C  | 5.13854700  | -0.70354300 | 0.26351000  |
| H  | 5.12520800  | -1.08051800 | -1.85614700 |
| H  | 4.84182300  | -0.38285400 | 2.37234900  |
| H  | 6.21121300  | -0.54295500 | 0.30902400  |
| Br | -3.44453800 | -1.33966800 | -0.13922800 |

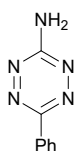

|   |             |             |             |
|---|-------------|-------------|-------------|
| C | -2.92580600 | 0.00001800  | -0.01062900 |
| C | -0.36404900 | 0.00005800  | 0.01372900  |
| N | -1.00090700 | -1.18158800 | 0.02812700  |
| N | -1.00087900 | 1.18168900  | 0.02524700  |
| N | -2.30327200 | -1.19389400 | 0.01841400  |
| N | -2.30328400 | 1.19395300  | 0.01575200  |
| C | 1.11487600  | 0.00002400  | 0.00491000  |
| C | 1.81773300  | 1.20907200  | 0.00089100  |

|   |             |             |             |
|---|-------------|-------------|-------------|
| C | 1.81765000  | -1.20906700 | -0.00123700 |
| C | 3.20767700  | 1.20516200  | -0.00871400 |
| H | 1.26616900  | 2.14255600  | 0.00548200  |
| C | 3.20758800  | -1.20523500 | -0.01085700 |
| H | 1.26601700  | -2.14251900 | 0.00180100  |
| C | 3.90632700  | -0.00005600 | -0.01452700 |
| H | 3.74700600  | 2.14718200  | -0.01178600 |
| H | 3.74685900  | -2.14728100 | -0.01569300 |
| H | 4.99195300  | -0.00009800 | -0.02222900 |
| N | -4.27749000 | -0.00012200 | -0.08882900 |
| H | -4.75453200 | -0.86760300 | 0.10576300  |
| H | -4.75463000 | 0.86763600  | 0.10429600  |

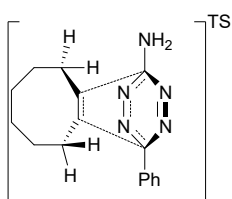

|   |             |             |             |
|---|-------------|-------------|-------------|
| C | -1.33581400 | -2.32617400 | -0.14720600 |
| C | 0.87922300  | -1.17325600 | 0.02769000  |
| N | 0.39195200  | -1.75574000 | 1.17520000  |
| N | 0.56723100  | -1.72831700 | -1.18978500 |
| N | -0.73578800 | -2.34820900 | 1.09264500  |
| C | -1.77225800 | -0.17636900 | -0.22002100 |
| C | -2.87613000 | -0.00101000 | 0.78390800  |
| C | -1.12881100 | 2.41062400  | -1.43238400 |
| C | -3.45838800 | 1.42342700  | 0.61664000  |
| C | -1.74054400 | 3.24162200  | -0.29188500 |
| C | -2.44944600 | 2.55696800  | 0.90204600  |
| H | -2.48368800 | -0.11862400 | 1.80185400  |
| H | -3.86702500 | 1.52649200  | -0.39766900 |
| H | -1.93094500 | 1.86880300  | -1.94817500 |
| H | -2.46704100 | 3.91689500  | -0.76191400 |
| H | -3.67592700 | -0.73712600 | 0.64239900  |
| H | -0.72022500 | 3.11444000  | -2.16786800 |
| H | -4.31048500 | 1.52023300  | 1.29881700  |
| H | -0.95998100 | 3.89115100  | 0.12558800  |
| H | -2.97990000 | 3.35871600  | 1.42847100  |
| H | -1.70664800 | 2.19293900  | 1.62032800  |
| C | -0.56485800 | 0.45833900  | -0.00421200 |
| C | -0.02774800 | 1.39834200  | -1.05811500 |
| H | 0.86697400  | 1.91085300  | -0.69036600 |
| H | 0.26242300  | 0.84164500  | -1.95888100 |
| H | -2.10798200 | -0.23562500 | -1.25810000 |
| H | -0.32226300 | 0.70856900  | 1.02764900  |
| N | -0.55829800 | -2.32320300 | -1.28515100 |
| C | 2.16587800  | -0.44362300 | 0.13497300  |

|   |             |             |             |
|---|-------------|-------------|-------------|
| C | 2.94118800  | -0.20102500 | -1.00244100 |
| C | 2.58429300  | 0.05029400  | 1.37397500  |
| C | 4.12194400  | 0.52704600  | -0.89750500 |
| H | 2.61337100  | -0.59396700 | -1.95882800 |
| C | 3.76521300  | 0.77788800  | 1.47238700  |
| H | 1.98257300  | -0.15219100 | 2.25440200  |
| C | 4.53645100  | 1.02018900  | 0.33746400  |
| H | 4.72161400  | 0.70777000  | -1.78431000 |
| H | 4.08523800  | 1.15560000  | 2.43862200  |
| H | 5.45761200  | 1.58930400  | 0.41607100  |
| N | -2.54298300 | -2.98122500 | -0.24417600 |
| H | -3.12466700 | -2.91762100 | 0.58007300  |
| H | -3.02898700 | -2.85107700 | -1.12117100 |

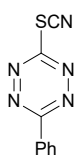

|   |             |             |             |
|---|-------------|-------------|-------------|
| C | -1.91656900 | 0.46508800  | 0.00005600  |
| C | 0.60885800  | 0.16166200  | -0.00016800 |
| N | -0.16448100 | -0.93728900 | -0.00079600 |
| N | 0.12090000  | 1.41717300  | 0.00025600  |
| N | -1.46353000 | -0.78488700 | -0.00065400 |
| N | -1.17348500 | 1.57392600  | 0.00040900  |
| C | 2.07227700  | -0.01623500 | -0.00006900 |
| C | 2.91410700  | 1.10159200  | -0.00059200 |
| C | 2.61982200  | -1.30410700 | 0.00057200  |
| C | 4.29253300  | 0.92821900  | -0.00049500 |
| H | 2.48085800  | 2.09543600  | -0.00106000 |
| C | 3.99930500  | -1.46806200 | 0.00070200  |
| H | 1.95939700  | -2.16392600 | 0.00094200  |
| C | 4.83710800  | -0.35446200 | 0.00016600  |
| H | 4.94339200  | 1.79649700  | -0.00093900 |
| H | 4.42154600  | -2.46766000 | 0.00123800  |
| H | 5.91463000  | -0.48626600 | 0.00025800  |
| S | -3.66201100 | 0.80219500  | 0.00044600  |
| C | -4.26003400 | -0.79129500 | -0.00007800 |
| N | -4.76684500 | -1.83229400 | -0.00037800 |

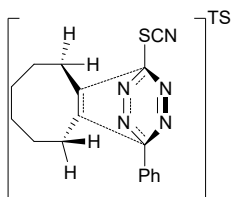

|   |             |             |             |
|---|-------------|-------------|-------------|
| C | 1.44907000  | -1.67931100 | -0.26974900 |
| C | -1.00375400 | -1.29662200 | -0.15555200 |
| N | -0.48966700 | -1.62909200 | -1.37862200 |

|   |             |             |             |
|---|-------------|-------------|-------------|
| N | -0.39786000 | -1.75290900 | 0.98431900  |
| N | 0.77897400  | -1.82807800 | -1.44007500 |
| C | 1.27398400  | 0.61277300  | -0.06387100 |
| C | 2.14252200  | 1.15783100  | -1.15971400 |
| C | -0.01076800 | 2.74228900  | 1.45144500  |
| C | 2.25984700  | 2.68425800  | -0.90831000 |
| C | 0.18366100  | 3.79355700  | 0.34489900  |
| C | 0.91909600  | 3.44753100  | -0.97387600 |
| H | 1.68095600  | 0.97893200  | -2.13874900 |
| H | 2.74556900  | 2.84702900  | 0.06274600  |
| H | 0.97009400  | 2.45410700  | 1.84761400  |
| H | 0.72156100  | 4.62855600  | 0.81137900  |
| H | 3.14142900  | 0.71249000  | -1.16737800 |
| H | -0.53889800 | 3.23013300  | 2.27958700  |
| H | 2.94329100  | 3.09083100  | -1.66160400 |
| H | -0.80001900 | 4.19435000  | 0.06679000  |
| H | 1.10273400  | 4.40938600  | -1.46613700 |
| H | 0.24247100  | 2.91260300  | -1.64989000 |
| C | -0.07940100 | 0.82883800  | -0.11257500 |
| C | -0.77148800 | 1.45290300  | 1.07379200  |
| H | -1.81761200 | 1.66869200  | 0.83413000  |
| H | -0.76471400 | 0.77279300  | 1.93596100  |
| H | 1.73627400  | 0.58365300  | 0.92542000  |
| H | -0.52078000 | 1.01112200  | -1.09171600 |
| N | 0.86570600  | -1.96596100 | 0.92599400  |
| C | -2.43385600 | -0.93468300 | -0.08313100 |
| C | -3.10711100 | -0.96032300 | 1.14198900  |
| C | -3.10510300 | -0.52311500 | -1.23876800 |
| C | -4.44199500 | -0.57572600 | 1.20611000  |
| H | -2.57905600 | -1.28774400 | 2.03107000  |
| C | -4.43845500 | -0.13803900 | -1.16659300 |
| H | -2.57593400 | -0.51641400 | -2.18635100 |
| C | -5.10891200 | -0.16179000 | 0.05523300  |
| H | -4.96294300 | -0.60061300 | 2.15792300  |
| H | -4.95642300 | 0.17995900  | -2.06582100 |
| H | -6.15021000 | 0.14016600  | 0.10934800  |
| S | 3.20247000  | -2.00883600 | -0.44220100 |
| C | 3.73775400  | -1.20787600 | 0.96059100  |
| N | 4.15029600  | -0.64162100 | 1.88400900  |

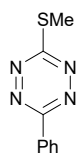

|   |             |             |             |
|---|-------------|-------------|-------------|
| C | -2.14059400 | -0.29763100 | -0.00004200 |
| C | 0.41305500  | -0.10227000 | 0.00016500  |
| N | -0.13306400 | -1.33676600 | 0.00010400  |

|   |             |             |             |
|---|-------------|-------------|-------------|
| N | -0.30651900 | 1.02466900  | 0.00027900  |
| N | -1.42711800 | -1.44105500 | 0.00000200  |
| N | -1.61505800 | 0.92980400  | 0.00017400  |
| C | 1.88605600  | 0.00318900  | 0.00007400  |
| C | 2.49855700  | 1.26099700  | -0.00012400 |
| C | 2.67291900  | -1.15337600 | 0.00015200  |
| C | 3.88462100  | 1.35719900  | -0.00023200 |
| H | 1.88042200  | 2.15177800  | -0.00019100 |
| C | 4.05881400  | -1.04877900 | 0.00005000  |
| H | 2.19006300  | -2.12407400 | 0.00028700  |
| C | 4.66743900  | 0.20435900  | -0.00014000 |
| H | 4.35543300  | 2.33510800  | -0.00039200 |
| H | 4.66533900  | -1.94880600 | 0.00011700  |
| H | 5.75023500  | 0.28271100  | -0.00021100 |
| S | -3.87845000 | -0.51523800 | -0.00029400 |
| C | -4.40999400 | 1.21830300  | 0.00016800  |
| H | -5.50076100 | 1.19187300  | 0.00001300  |
| H | -4.04934300 | 1.73309600  | 0.89062300  |
| H | -4.04910300 | 1.73361200  | -0.88989300 |

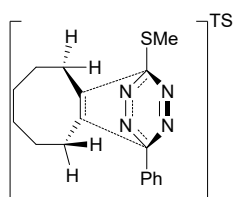

|   |             |             |             |
|---|-------------|-------------|-------------|
| C | 1.66296300  | -1.54752500 | -0.23944400 |
| C | -0.81960800 | -1.23944500 | -0.18554700 |
| N | -0.25453300 | -1.50448500 | -1.41204400 |
| N | -0.24164200 | -1.75464100 | 0.94220700  |
| N | 1.01238000  | -1.66639800 | -1.44391100 |
| C | 1.34786100  | 0.66920400  | 0.00839500  |
| C | 2.16386300  | 1.30239900  | -1.08020300 |
| C | -0.01029000 | 2.69834600  | 1.61158800  |
| C | 2.22244700  | 2.82150800  | -0.77895600 |
| C | 0.11760700  | 3.79509300  | 0.53965500  |
| C | 0.85107800  | 3.53181100  | -0.79933500 |
| H | 1.68314900  | 1.14138900  | -2.05318700 |
| H | 2.71523900  | 2.97655500  | 0.19044800  |
| H | 0.99042600  | 2.44441200  | 1.98174200  |
| H | 0.61997000  | 4.63961400  | 1.02858200  |
| H | 3.17580300  | 0.89063700  | -1.12799600 |
| H | -0.54504600 | 3.13415700  | 2.46444600  |
| H | 2.87588600  | 3.28319800  | -1.52742600 |
| H | -0.88855400 | 4.15572200  | 0.28829500  |
| H | 0.98889800  | 4.51950000  | -1.25429100 |
| H | 0.18926000  | 2.99620200  | -1.48887400 |
| C | -0.01957100 | 0.82818000  | -0.01220100 |

|   |             |             |             |
|---|-------------|-------------|-------------|
| C | -0.71726500 | 1.38918700  | 1.20289300  |
| H | -1.77549100 | 1.56686100  | 0.98601000  |
| H | -0.66857000 | 0.68173300  | 2.04119600  |
| H | 1.82514400  | 0.64436400  | 0.99053700  |
| H | -0.46899900 | 1.06090900  | -0.97625200 |
| N | 1.03101400  | -1.91350000 | 0.91755300  |
| C | -2.27556500 | -0.97000600 | -0.15152800 |
| C | -2.99050600 | -1.09513900 | 1.04322500  |
| C | -2.93165900 | -0.54473500 | -1.31033400 |
| C | -4.34865700 | -0.79687000 | 1.07433200  |
| H | -2.47435900 | -1.43252800 | 1.93560600  |
| C | -4.28918800 | -0.24698100 | -1.27230000 |
| H | -2.37103200 | -0.46202700 | -2.23608300 |
| C | -5.00070600 | -0.37040600 | -0.08047700 |
| H | -4.89991500 | -0.89973200 | 2.00385700  |
| H | -4.79367000 | 0.08043300  | -2.17601600 |
| H | -6.06048800 | -0.13666100 | -0.05259500 |
| S | 3.41599600  | -1.76659000 | -0.33659000 |
| C | 3.81369400  | -1.82894700 | 1.43164000  |
| H | 4.90094500  | -1.90314000 | 1.48973000  |
| H | 3.48502200  | -0.92120900 | 1.94156800  |
| H | 3.35092000  | -2.69582700 | 1.90108100  |

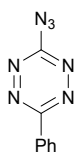

|   |             |             |             |
|---|-------------|-------------|-------------|
| C | -2.25444500 | 0.47597900  | -0.00007200 |
| C | 0.27928700  | 0.16492600  | 0.00000500  |
| N | -0.49060500 | -0.93246100 | -0.00038700 |
| N | -0.21394400 | 1.41907000  | 0.00038000  |
| N | -1.78774700 | -0.77678800 | -0.00040700 |
| N | -1.50381800 | 1.58732700  | 0.00031300  |
| C | 1.74544700  | -0.00620000 | 0.00001400  |
| C | 2.58235000  | 1.11488000  | -0.00020400 |
| C | 2.30117400  | -1.29020100 | 0.00022900  |
| C | 3.96206500  | 0.94893800  | -0.00021200 |
| H | 2.14302100  | 2.10604800  | -0.00036200 |
| C | 3.68167000  | -1.44740700 | 0.00023400  |
| H | 1.64513700  | -2.15346300 | 0.00038200  |
| C | 4.51445000  | -0.33014800 | 0.00001300  |
| H | 4.60784700  | 1.82117200  | -0.00039500 |
| H | 4.10880800  | -2.44510100 | 0.00041700  |
| H | 5.59269300  | -0.45627300 | 0.00001100  |
| N | -3.62745900 | 0.70319300  | -0.00017800 |
| N | -4.31920400 | -0.33750100 | 0.00017300  |
| N | -5.05286400 | -1.18526700 | 0.00009300  |

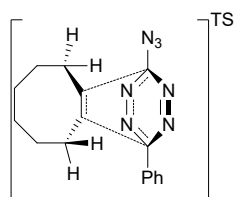

|   |             |             |             |
|---|-------------|-------------|-------------|
| C | -1.60429300 | -1.63175100 | -0.51239700 |
| C | 0.82547200  | -1.25990600 | -0.11003300 |
| N | 0.09818200  | -1.75045700 | 0.94202600  |
| N | 0.45177800  | -1.57960800 | -1.39224900 |
| N | -1.15065500 | -1.95111200 | 0.73633700  |
| C | -1.39910700 | 0.58306300  | -0.39492000 |
| C | -2.49080300 | 0.98611100  | 0.55430200  |
| C | 0.10271000  | 2.92435100  | -1.28661300 |
| C | -2.59216900 | 2.53219100  | 0.51144300  |
| C | -0.33077700 | 3.80063300  | -0.09870900 |
| C | -1.31601300 | 3.26909800  | 0.97185200  |
| H | -2.25213000 | 0.66242800  | 1.57535500  |
| H | -2.86391700 | 2.84271200  | -0.50616400 |
| H | -0.77506300 | 2.70292800  | -1.90562400 |
| H | -0.77615400 | 4.70409900  | -0.53434800 |
| H | -3.45753700 | 0.55702000  | 0.27213300  |
| H | 0.76978500  | 3.52787400  | -1.91405900 |
| H | -3.42991200 | 2.82724500  | 1.15267500  |
| H | 0.56826500  | 4.14064700  | 0.43193600  |
| H | -1.62366800 | 4.14870200  | 1.54876000  |
| H | -0.78376100 | 2.63594900  | 1.69026800  |
| C | -0.08592400 | 0.79327700  | -0.04129900 |
| C | 0.80686100  | 1.59088500  | -0.96023400 |
| H | 1.78014700  | 1.76460600  | -0.49030800 |
| H | 0.98714900  | 1.04662000  | -1.89670500 |
| H | -1.64999600 | 0.69027400  | -1.45223000 |
| H | 0.13618700  | 0.85220200  | 1.02338300  |
| N | -0.79273100 | -1.77910900 | -1.60528600 |
| C | 2.24935400  | -0.93747900 | 0.13195200  |
| C | 3.14290000  | -0.83351300 | -0.93796500 |
| C | 2.69356800  | -0.68816600 | 1.43390200  |
| C | 4.46840100  | -0.48328700 | -0.70323900 |
| H | 2.79069300  | -1.03612000 | -1.94364700 |
| C | 4.01939200  | -0.33762600 | 1.66133600  |
| H | 1.99493200  | -0.78153700 | 2.25935300  |
| C | 4.90936200  | -0.23237000 | 0.59399700  |
| H | 5.15955300  | -0.40812800 | -1.53688000 |
| H | 4.35954900  | -0.14743700 | 2.67446400  |
| H | 5.94407500  | 0.04246100  | 0.77372000  |
| N | -2.97341700 | -1.78221200 | -0.79287800 |
| N | -3.67808000 | -1.99792800 | 0.21043400  |

N            -4.42247800   -2.19180300   1.02985500

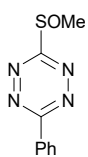

C            1.82383100   -0.00354900   0.21341900  
 C            -0.71711900   -0.00381600   0.09759300  
 N            -0.09474300   1.17812800   0.27301600  
 N            -0.07668800   -1.18079000   -0.00237500  
 N            1.20964500   1.17302300   0.33698700  
 N            1.23292700   -1.18300700   0.05951700  
 C            -2.19012200   -0.00581900   0.01696300  
 C            -2.87810100   -1.21037100   -0.16691800  
 C            -2.90010800   1.19517800   0.12377600  
 C            -4.26526900   -1.20911900   -0.24312800  
 H            -2.31834100   -2.13531000   -0.24794400  
 C            -4.28727900   1.18737800   0.04649500  
 H            -2.35828300   2.12327700   0.26674800  
 C            -4.97162600   -0.01255200   -0.13678100  
 H            -4.79644600   -2.14459100   -0.38558400  
 H            -4.83561300   2.12011300   0.12997500  
 H            -6.05556000   -0.01523900   -0.19657400  
 S            3.64390900   0.00814700   0.38345500  
 O            4.14807600   -1.33206600   -0.03450900  
 C            3.90042500   1.15674800   -1.00285100  
 H            4.97171100   1.35992300   -1.04461800  
 H            3.57853400   0.66647300   -1.92409800  
 H            3.34106200   2.07557900   -0.81854100

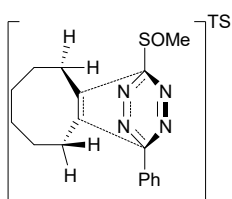

C            -1.60392600   -1.29773100   0.17422800  
 C            0.88161500   -1.34308000   0.16454700  
 N            0.27097700   -1.56288500   1.36362600  
 N            0.25842500   -1.70491700   -0.99670700  
 N            -1.01957100   -1.54169600   1.36811900  
 C            -1.10214200   0.94969000   -0.03238900  
 C            -1.90351900   1.63348700   1.03850200  
 C            0.52684100   2.81214700   -1.55921200  
 C            -1.77649600   3.15491100   0.75869400  
 C            0.46897100   3.90479900   -0.47631700  
 C            -0.33531200   3.70507600   0.83350700  
 H            -1.50196300   1.40497000   2.03336600



|   |             |             |             |
|---|-------------|-------------|-------------|
| H | -2.21674900 | 3.36868700  | -0.22384300 |
| H | -0.47823900 | 2.66542200  | -1.97161300 |
| H | 0.07175300  | 4.80021500  | -0.97122800 |
| H | -2.96045000 | 1.35654900  | 1.00947000  |
| H | 1.14024900  | 3.19745100  | -2.38297400 |
| H | -2.39997700 | 3.67922200  | 1.49120900  |
| H | 1.49604500  | 4.16056500  | -0.18360700 |
| H | -0.37797400 | 4.69591400  | 1.30058900  |
| H | 0.24027700  | 3.09045100  | 1.53460400  |
| C | 0.26353700  | 0.95980800  | 0.04558700  |
| C | 1.07130300  | 1.42984800  | -1.13669400 |
| H | 2.13358400  | 1.48648900  | -0.87750000 |
| H | 0.97463800  | 0.73719500  | -1.98356300 |
| H | -1.56551100 | 0.95002200  | -1.02078100 |
| H | 0.71129700  | 1.08511700  | 1.03094800  |
| N | -1.02683400 | -1.68576500 | -0.99076400 |
| C | 2.34814700  | -1.17939900 | 0.14689100  |
| C | 3.05785800  | -1.30525100 | -1.05133100 |
| C | 3.02493600  | -0.85489700 | 1.32677600  |
| C | 4.43431200  | -1.10764100 | -1.06459500 |
| H | 2.52357400  | -1.56227300 | -1.95963600 |
| C | 4.40030400  | -0.65693000 | 1.30561900  |
| H | 2.46447100  | -0.76699600 | 2.25203100  |
| C | 5.10735700  | -0.78147700 | 0.11074800  |
| H | 4.98287900  | -1.20928100 | -1.99563200 |
| H | 4.92235200  | -0.40534700 | 2.22336400  |
| H | 6.18157500  | -0.62540600 | 0.09652100  |
| S | -3.42335700 | -1.15635400 | 0.20098300  |
| O | -3.81462000 | -0.22391500 | -0.91089900 |
| C | -3.71360000 | -2.83964800 | -0.41089600 |
| H | -4.79449400 | -2.95884600 | -0.50323800 |
| H | -3.22950900 | -2.93368300 | -1.38441100 |
| H | -3.30924700 | -3.55889100 | 0.30548900  |

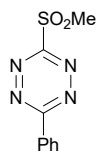

|   |             |             |             |
|---|-------------|-------------|-------------|
| C | -1.55092700 | 0.08163700  | 0.00760700  |
| C | 0.98639000  | 0.02361600  | 0.01284100  |
| N | 0.37663300  | 1.22617800  | 0.04686800  |
| N | 0.33042900  | -1.15047200 | -0.01056300 |
| N | -0.92864400 | 1.25653500  | 0.05378400  |
| N | -0.97778400 | -1.11514800 | -0.02559500 |
| C | 2.45898900  | -0.00305100 | 0.00749000  |
| C | 3.13713600  | -1.22655600 | -0.04294000 |
| C | 3.17955600  | 1.19613600  | 0.05097400  |

|   |             |             |             |
|---|-------------|-------------|-------------|
| C | 4.52592400  | -1.24598600 | -0.04939900 |
| H | 2.56955000  | -2.14955900 | -0.07774800 |
| C | 4.56831800  | 1.16697000  | 0.04436000  |
| H | 2.64446000  | 2.13814400  | 0.08941200  |
| C | 5.24270900  | -0.05152400 | -0.00567700 |
| H | 5.05036700  | -2.19504900 | -0.08950500 |
| H | 5.12570700  | 2.09727100  | 0.07826100  |
| H | 6.32810000  | -0.07038800 | -0.01110500 |
| S | -3.36219500 | 0.12812400  | -0.09260300 |
| O | -3.70499300 | -0.03608600 | -1.49719800 |
| C | -3.82490900 | -1.35583500 | 0.78284700  |
| H | -4.91412300 | -1.39847900 | 0.71612600  |
| H | -3.36929000 | -2.21732300 | 0.29634900  |
| H | -3.50959900 | -1.26802900 | 1.82319900  |
| O | -3.80420700 | 1.28375300  | 0.66676900  |

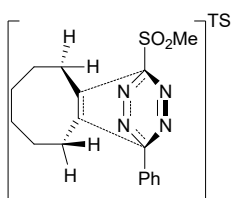

|   |             |             |             |
|---|-------------|-------------|-------------|
| C | -1.52199100 | -1.15912600 | 0.04059900  |
| C | 0.94653300  | -1.38451500 | 0.11942300  |
| N | 0.27456300  | -1.56282000 | 1.29360300  |
| N | 0.34440700  | -1.68986500 | -1.06615400 |
| N | -1.01029300 | -1.45564300 | 1.25329500  |
| C | -0.85292500 | 1.09478300  | -0.11007800 |
| C | -1.63580100 | 1.81653900  | 0.94958100  |
| C | 0.97953500  | 2.83571000  | -1.54554800 |
| C | -1.37399200 | 3.32688900  | 0.70179200  |
| C | 0.96847000  | 3.91107900  | -0.44379100 |
| C | 0.10410900  | 3.75531000  | 0.83353900  |
| H | -1.28110500 | 1.53759200  | 1.94918700  |
| H | -1.76188800 | 3.59566500  | -0.28952100 |
| H | -0.01695100 | 2.78017200  | -1.99921400 |
| H | 0.66261700  | 4.84346600  | -0.93531700 |
| H | -2.70801600 | 1.61714700  | 0.90214900  |
| H | 1.65488000  | 3.18210100  | -2.33748600 |
| H | -1.97640700 | 3.88747900  | 1.42479000  |
| H | 2.00131900  | 4.07861900  | -0.11047200 |
| H | 0.12704900  | 4.73793900  | 1.31891300  |
| H | 0.60264800  | 3.08298100  | 1.54079700  |
| C | 0.50333200  | 0.98840900  | 0.01409600  |
| C | 1.39103900  | 1.40579500  | -1.12977100 |
| H | 2.44373600  | 1.36952100  | -0.83086500 |
| H | 1.27005600  | 0.73690300  | -1.99261000 |
| H | -1.27193300 | 1.14875300  | -1.11672300 |

|   |             |             |             |
|---|-------------|-------------|-------------|
| H | 0.92428500  | 1.05128800  | 1.01704000  |
| N | -0.93754500 | -1.57616600 | -1.10513700 |
| C | 2.41838800  | -1.31459600 | 0.15888600  |
| C | 3.16247200  | -1.46848500 | -1.01518700 |
| C | 3.06889200  | -1.04970500 | 1.36831300  |
| C | 4.54778900  | -1.35672900 | -0.97541300 |
| H | 2.64748900  | -1.67862500 | -1.94639900 |
| C | 4.45357500  | -0.93723100 | 1.39967800  |
| H | 2.48106500  | -0.93987200 | 2.27399000  |
| C | 5.19497600  | -1.08887900 | 0.22894600  |
| H | 5.12353700  | -1.47932900 | -1.88721900 |
| H | 4.95591300  | -0.73139300 | 2.33943800  |
| H | 6.27650100  | -0.99932000 | 0.25606400  |
| S | -3.31236800 | -0.93079400 | -0.07464800 |
| O | -3.55404600 | -0.02949000 | -1.19509500 |
| C | -3.86001300 | -2.56691600 | -0.53581200 |
| H | -4.94292800 | -2.50266900 | -0.66043100 |
| H | -3.37359400 | -2.83957400 | -1.47285800 |
| H | -3.60468700 | -3.25574400 | 0.27070600  |
| O | -3.80844800 | -0.61912600 | 1.25705000  |

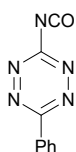

|   |             |             |             |
|---|-------------|-------------|-------------|
| C | -2.20925500 | 0.42323100  | -0.00004200 |
| C | 0.33055800  | 0.14614700  | -0.00035100 |
| N | -0.17689400 | 1.39030100  | -0.00013200 |
| N | -0.42781700 | -0.96370600 | -0.00060100 |
| N | -1.47323500 | 1.53941000  | -0.00000900 |
| N | -1.72362300 | -0.82667500 | -0.00043400 |
| C | 1.79778700  | -0.01054200 | -0.00016000 |
| C | 2.36600400  | -1.28909900 | 0.00003900  |
| C | 2.62293300  | 1.11944300  | -0.00009800 |
| C | 3.74805300  | -1.43212500 | 0.00028100  |
| H | 1.71883600  | -2.15898600 | 0.00000300  |
| C | 4.00404900  | 0.96752100  | 0.00014000  |
| H | 2.17311900  | 2.10592000  | -0.00022200 |
| C | 4.56903400  | -0.30622800 | 0.00032300  |
| H | 4.18554400  | -2.42526700 | 0.00045000  |
| H | 4.64118600  | 1.84603600  | 0.00019000  |
| H | 5.64850400  | -0.42138000 | 0.00049900  |
| N | -3.57694400 | 0.59312000  | 0.00044700  |
| C | -4.46761600 | -0.24156600 | 0.00025900  |
| O | -5.41086100 | -0.91677000 | 0.00022900  |

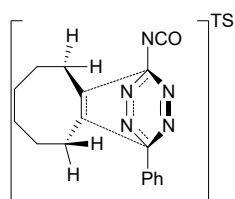

|   |             |             |             |
|---|-------------|-------------|-------------|
| C | -1.62341800 | -1.60656300 | -0.45208200 |
| C | 0.82291800  | -1.29749300 | -0.08143100 |
| N | 0.09022800  | -1.74213700 | 0.98773900  |
| N | 0.42722100  | -1.62348100 | -1.35136100 |
| N | -1.16508900 | -1.91342200 | 0.80048000  |
| C | -1.36083900 | 0.62623300  | -0.35264700 |
| C | -2.40179500 | 1.06974200  | 0.63319300  |
| C | 0.18101600  | 2.89716400  | -1.34198200 |
| C | -2.46653200 | 2.61740200  | 0.56107400  |
| C | -0.19358700 | 3.81008700  | -0.16130200 |
| C | -1.15460300 | 3.33009700  | 0.95517900  |
| H | -2.12340600 | 0.76149500  | 1.64873700  |
| H | -2.77099500 | 2.91447400  | -0.45127900 |
| H | -0.71986900 | 2.68828300  | -1.93133800 |
| H | -0.63102900 | 4.71396800  | -0.60404200 |
| H | -3.39081700 | 0.65843000  | 0.40754300  |
| H | 0.84636000  | 3.46870500  | -2.00044200 |
| H | -3.26991200 | 2.94696100  | 1.22884500  |
| H | 0.73020100  | 4.14021700  | 0.33176100  |
| H | -1.41792600 | 4.23141500  | 1.52041900  |
| H | -0.61354600 | 2.70027300  | 1.67002300  |
| C | -0.03312700 | 0.80276200  | -0.04508400 |
| C | 0.85611200  | 1.55024500  | -1.00740100 |
| H | 1.84736400  | 1.70477900  | -0.56941500 |
| H | 0.99233900  | 0.98082400  | -1.93634900 |
| H | -1.64607800 | 0.72399200  | -1.40206800 |
| H | 0.22507300  | 0.87194700  | 1.01072600  |
| N | -0.82797700 | -1.78726800 | -1.54717600 |
| C | 2.25462100  | -0.99953000 | 0.14210600  |
| C | 3.13811800  | -0.92882400 | -0.93896800 |
| C | 2.71781800  | -0.74193000 | 1.43583400  |
| C | 4.47300900  | -0.60321000 | -0.72329300 |
| H | 2.77054100  | -1.13740700 | -1.93791100 |
| C | 4.05298300  | -0.41573100 | 1.64401400  |
| H | 2.02659500  | -0.80964900 | 2.26994700  |
| C | 4.93302400  | -0.34383600 | 0.56571900  |
| H | 5.15648700  | -0.55386500 | -1.56511900 |
| H | 4.40822300  | -0.21879400 | 2.65062700  |
| H | 5.97512700  | -0.08826600 | 0.73054600  |
| N | -2.98798500 | -1.71187100 | -0.68204900 |
| C | -3.89981300 | -1.89634500 | 0.10383800  |
| O | -4.86561900 | -2.05901800 | 0.73184400  |

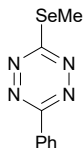

|    |             |             |             |
|----|-------------|-------------|-------------|
| C  | -1.54342800 | -0.19885200 | 0.00007100  |
| C  | 1.01396600  | -0.06422700 | 0.00021400  |
| N  | 0.44008800  | -1.28467800 | -0.00010300 |
| N  | 0.32114100  | 1.08088300  | 0.00062600  |
| N  | -0.85778200 | -1.35697800 | -0.00012500 |
| N  | -0.98805100 | 1.01474200  | 0.00050800  |
| C  | 2.48878400  | 0.00778100  | 0.00009500  |
| C  | 3.13009000  | 1.25119700  | -0.00049100 |
| C  | 3.24898100  | -1.16648100 | 0.00051700  |
| C  | 4.51802000  | 1.31555000  | -0.00064600 |
| H  | 2.53253900  | 2.15589500  | -0.00084300 |
| C  | 4.63683800  | -1.09380300 | 0.00037400  |
| H  | 2.74399900  | -2.12584100 | 0.00093800  |
| C  | 5.27409300  | 0.14506700  | -0.00020400 |
| H  | 5.01109600  | 2.28242200  | -0.00112800 |
| H  | 5.22259400  | -2.00747200 | 0.00071900  |
| H  | 6.35840700  | 0.19849900  | -0.00031100 |
| Se | -3.41477600 | -0.37017200 | -0.00032200 |
| C  | -3.83463700 | 1.52633500  | 0.00056600  |
| H  | -3.42397100 | 1.98964300  | -0.89404000 |
| H  | -4.92287500 | 1.59066700  | 0.00096300  |
| H  | -3.42340500 | 1.98884100  | 0.89533300  |

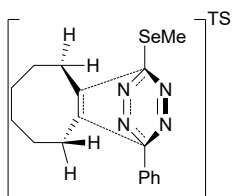

|   |             |             |             |
|---|-------------|-------------|-------------|
| C | -1.48530100 | -1.15161600 | -0.22490500 |
| C | 1.00155300  | -1.25559100 | -0.00130700 |
| N | 0.27050300  | -1.56426000 | 1.11480200  |
| N | 0.48385200  | -1.53804700 | -1.24230200 |
| N | -1.00765100 | -1.51203700 | 1.00216300  |
| C | -0.82417800 | 0.98750100  | -0.22127800 |
| C | -1.71153400 | 1.65876700  | 0.78535400  |
| C | 1.02603300  | 2.91422000  | -1.39951800 |
| C | -1.50606100 | 3.18658700  | 0.63719300  |
| C | 0.89157600  | 3.92843500  | -0.25078000 |
| C | -0.07017200 | 3.66998900  | 0.93500400  |
| H | -1.43410000 | 1.35073100  | 1.80186700  |
| H | -1.80718700 | 3.49009800  | -0.37436700 |
| H | 0.06713600  | 2.84294600  | -1.92688200 |

|    |             |             |             |
|----|-------------|-------------|-------------|
| H  | 0.59281100  | 4.87689600  | -0.71528800 |
| H  | -2.76210900 | 1.40616500  | 0.61129800  |
| H  | 1.73750700  | 3.33046500  | -2.12322200 |
| H  | -2.20226500 | 3.68336900  | 1.32204100  |
| H  | 1.88743400  | 4.10842500  | 0.17525800  |
| H  | -0.13709300 | 4.62347300  | 1.47154400  |
| H  | 0.39269900  | 2.97848600  | 1.64779400  |
| C  | 0.53216200  | 0.93252900  | 0.00793900  |
| C  | 1.47768200  | 1.48606200  | -1.03147400 |
| H  | 2.50389500  | 1.48534800  | -0.65010500 |
| H  | 1.46499700  | 0.86644700  | -1.93789300 |
| H  | -1.14792700 | 1.10228600  | -1.25834900 |
| H  | 0.85912100  | 0.99720800  | 1.04485600  |
| N  | -0.78721400 | -1.48688700 | -1.36150000 |
| C  | 2.47493500  | -1.21704400 | 0.13575000  |
| C  | 3.29529200  | -1.33962800 | -0.98935400 |
| C  | 3.04954900  | -1.01124400 | 1.39347200  |
| C  | 4.67710400  | -1.25560100 | -0.85341400 |
| H  | 2.84074900  | -1.50735200 | -1.95982000 |
| C  | 4.43108100  | -0.92702500 | 1.52246000  |
| H  | 2.40462300  | -0.92852200 | 2.26264300  |
| C  | 5.24816100  | -1.04687100 | 0.39979900  |
| H  | 5.30982900  | -1.35544700 | -1.72982300 |
| H  | 4.87163800  | -0.76863300 | 2.50187700  |
| H  | 6.32683000  | -0.97977600 | 0.50233900  |
| Se | -3.36311700 | -1.02010400 | -0.46581900 |
| C  | -3.87420300 | -1.27029900 | 1.39281300  |
| H  | -3.61870100 | -2.28222200 | 1.69907200  |
| H  | -3.36870300 | -0.54341400 | 2.02715800  |
| H  | -4.95370000 | -1.11983400 | 1.42720100  |

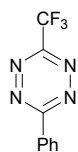

|   |             |             |             |
|---|-------------|-------------|-------------|
| C | 1.85984700  | 0.02293500  | 0.01785000  |
| C | -0.68288300 | 0.01048900  | -0.00068900 |
| N | -0.05559900 | 1.19901500  | 0.00308300  |
| N | -0.04344100 | -1.17619700 | -0.00797400 |
| N | 1.25314100  | 1.20506900  | 0.01131300  |
| N | 1.26057300  | -1.16797300 | 0.00202700  |
| C | -2.15663300 | 0.00233200  | -0.00068500 |
| C | -2.84984800 | -1.21341100 | 0.00363900  |
| C | -2.86225900 | 1.21097000  | -0.00438000 |
| C | -4.23906000 | -1.21568600 | 0.00425000  |
| H | -2.29329500 | -2.14373800 | 0.00664500  |
| C | -4.25127200 | 1.19916000  | -0.00411800 |

|   |             |             |             |
|---|-------------|-------------|-------------|
| H | -2.31486100 | 2.14673400  | -0.00760800 |
| C | -4.94098000 | -0.01185800 | 0.00028700  |
| H | -4.77523300 | -2.15904000 | 0.00798400  |
| H | -4.79708400 | 2.13697400  | -0.00733000 |
| H | -6.02656000 | -0.01735400 | 0.00074900  |
| C | 3.37680100  | 0.00046600  | 0.00354800  |
| F | 3.81964900  | -0.33843800 | -1.21055200 |
| F | 3.87700200  | 1.19047200  | 0.31643900  |
| F | 3.83468600  | -0.89818400 | 0.87435900  |

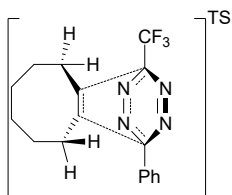

|   |             |             |             |
|---|-------------|-------------|-------------|
| C | -1.58828500 | -1.37945100 | -0.02021600 |
| C | 0.89329200  | -1.32691000 | 0.08865600  |
| N | 0.23311800  | -1.59704100 | 1.25371300  |
| N | 0.34044200  | -1.68273000 | -1.11025800 |
| N | -1.05182600 | -1.62762300 | 1.19869500  |
| C | -1.13816200 | 0.87787300  | -0.16370700 |
| C | -2.04801300 | 1.51898700  | 0.84750900  |
| C | 0.55728000  | 2.85946900  | -1.47460900 |
| C | -1.93178300 | 3.05121100  | 0.63589400  |
| C | 0.38968700  | 3.90381600  | -0.35724700 |
| C | -0.51912200 | 3.62973100  | 0.86698300  |
| H | -1.73219700 | 1.26050500  | 1.86558100  |
| H | -2.28176700 | 3.29773200  | -0.37538800 |
| H | -0.40864200 | 2.71039600  | -1.97197900 |
| H | 0.01806700  | 4.81391600  | -0.84510400 |
| H | -3.08964400 | 1.21568900  | 0.72758200  |
| H | 1.22392400  | 3.29028000  | -2.23155100 |
| H | -2.63499900 | 3.53224000  | 1.32455300  |
| H | 1.38350300  | 4.16186600  | 0.03174300  |
| H | -0.62901600 | 4.59662700  | 1.37128100  |
| H | 0.00713500  | 2.99599800  | 1.58929600  |
| C | 0.21794900  | 0.92651500  | 0.02633900  |
| C | 1.10178300  | 1.47393300  | -1.06604900 |
| H | 2.13763900  | 1.54570800  | -0.71921000 |
| H | 1.09465900  | 0.81616100  | -1.94552700 |
| H | -1.49590800 | 0.90839500  | -1.19454600 |
| H | 0.57745300  | 1.02949800  | 1.04942700  |
| N | -0.94154500 | -1.71579900 | -1.16618300 |
| C | 2.35495800  | -1.12794000 | 0.14859100  |
| C | 3.12677600  | -1.21565200 | -1.01395500 |
| C | 2.96265900  | -0.80775700 | 1.36662100  |
| C | 4.49645600  | -0.98254500 | -0.95437900 |

|   |             |             |             |
|---|-------------|-------------|-------------|
| H | 2.64577900  | -1.47238100 | -1.95162100 |
| C | 4.33164900  | -0.57396300 | 1.41809900  |
| H | 2.35484800  | -0.75267500 | 2.26409400  |
| C | 5.10058600  | -0.65901800 | 0.25850100  |
| H | 5.09382600  | -1.05521300 | -1.85765000 |
| H | 4.80045800  | -0.32636600 | 2.36516900  |
| H | 6.16966600  | -0.47543400 | 0.30129400  |
| C | -3.09921000 | -1.40767900 | -0.11274700 |
| F | -3.53186800 | -2.63041300 | -0.42663400 |
| F | -3.65957300 | -1.05514500 | 1.04427700  |
| F | -3.53601500 | -0.56936600 | -1.06152200 |
